# Supplementary material for: Whose shoulders is health research standing on? Determining the key actors and contents of the prevailing biomedical research agenda
Source: PubMed Central journal article supplement (PMC8026021; doi:10.1371/journal.pone.0249661), 2021-04-07
Supplement: pone.0249661.s001.pdf [file pone.0249661.s001.pdf]

| <b>RANK</b> | <b>FULL JOURNAL TITLE</b>                        | <b>IMPACT FACTOR</b> | <b>TOTAL CITES</b> | <b>TOTAL DOCUMENTS</b> |
|-------------|--------------------------------------------------|----------------------|--------------------|------------------------|
| 1           | CA-A CANCER JOURNAL FOR CLINICIANS               | 223.679              | 32,410             | 263                    |
| 2           | NEW ENGLAND JOURNAL OF MEDICINE                  | 70.670               | 344,581            | 5,969                  |
| 3           | LANCET                                           | 59.102               | 247,292            | 7,414                  |
| 4           | NATURE REVIEWS DRUG DISCOVERY                    | 57.618               | 32,266             | 330                    |
| 5           | NATURE REVIEWS CANCER                            | 51.848               | 50,529             | 104                    |
| 6           | JAMA-JOURNAL OF THE AMERICAN MEDICAL ASSOCIATION | 51.273               | 156,350            | 11,419                 |
| 7           | NATURE REVIEWS IMMUNOLOGY                        | 44.019               | 41,499             | 189                    |
| 8           | NATURE REVIEWS GENETICS                          | 43.704               | 36,697             | 63                     |
| 9           | NATURE REVIEWS MOLECULAR CELL BIOLOGY            | 43.351               | 45,869             | 87                     |
| 10          | NATURE                                           | 43.070               | 745,692            | 18,132                 |
| 11          | SCIENCE                                          | 41.063               | 680,994            | 16,259                 |
| 12          | CELL                                             | 36.216               | 242,829            | 6,244                  |
| 13          | LANCET ONCOLOGY                                  | 35.386               | 48,822             | 1,469                  |
| 14          | NATURE REVIEWS MICROBIOLOGY                      | 34.648               | 29,637             | 146                    |
| 15          | NATURE REVIEWS CLINICAL ONCOLOGY                 | 34.106               | 9,626              | 110                    |
| 16          | WORLD PSYCHIATRY                                 | 34.024               | 5,426              | 263                    |
| 17          | NATURE NANOTECHNOLOGY                            | 33.407               | 63,245             | 1,504                  |
| 18          | NATURE REVIEWS NEUROSCIENCE                      | 33.162               | 43,107             | 39                     |
| 19          | NATURE REVIEWS DISEASE PRIMERS                   | 32.274               | 4,339              | 174                    |
| 20          | NATURE BIOTECHNOLOGY                             | 31.864               | 60,971             | 2,409                  |
| 21          | NATURE MEDICINE                                  | 30.641               | 79,243             | 3,058                  |
| 22          | LANCET NEUROLOGY                                 | 28.755               | 30,748             | 668                    |
| 23          | NATURE METHODS                                   | 28.467               | 64,324             | 1,886                  |
| 24          | JOURNAL OF CLINICAL ONCOLOGY                     | 28.349               | 154,462            | 4,840                  |
| 25          | BMJ-BRITISH MEDICAL JOURNAL                      | 27.604               | 112,901            | 2,413                  |
| 26          | LANCET INFECTIOUS DISEASES                       | 27.516               | 23,088             | 736                    |
| 27          | ANNUAL REVIEW OF BIOCHEMISTRY                    | 26.922               | 20,344             | 630                    |
| 28          | CANCER DISCOVERY                                 | 26.370               | 13,715             | 555                    |
| 29          | NATURE GENETICS                                  | 25.455               | 93,920             | 4,036                  |
| 30          | EUROPEAN HEART JOURNAL                           | 24.889               | 58,233             | 4,636                  |
