# Supplementary material for: Whose shoulders is health research standing on? Determining the key actors and contents of the prevailing biomedical research agenda
Source: PubMed Central journal article supplement (PMC8026021; doi:10.1371/journal.pone.0249661), 2021-04-07
Supplement: pone.0249661.s002.pdf [file pone.0249661.s002.pdf]

| RANK | INSTITUTION/CORPORATION        | NUMBER OF DISTINCT DOCUMENTS |
|------|--------------------------------|------------------------------|
| 1    | HARVARD                        | 12067                        |
| 2    | UNIV CALIF                     | 11090                        |
| 3    | UNIV LONDON                    | 5598                         |
| 4    | UNIV TEXAS                     | 4874                         |
| 5    | UNIV WASHINGTON                | 4801                         |
| 6    | UNIV STANFORD                  | 3624                         |
| 7    | NIH                            | 3462                         |
| 8    | JOHNS HOPKINS UNIV             | 3256                         |
| 9    | UNIV OXFORD                    | 2968                         |
| 10   | MAX PLANCK                     | 2831                         |
| 11   | MIT                            | 2600                         |
| 12   | UNIV COLUMBIA                  | 2529                         |
| 13   | UNIV TORONTO                   | 2474                         |
| 14   | UNIV CAMBRIDGE                 | 2432                         |
| 15   | DUKE UNIV                      | 2419                         |
| 16   | UNIV PENN                      | 2377                         |
| 17   | MEM SLOAN KETTERING CANC CTR   | 2300                         |
| 18   | UNIV YALE                      | 2194                         |
| 19   | UNIV MICHIGAN                  | 2171                         |
| 20   | UNIV CORNELL                   | 2043                         |
| 21   | MAYO CLIN                      | 1889                         |
| 22   | UNIV COLORADO                  | 1733                         |
| 23   | MT SINAI HEALTH SYSTEM         | 1718                         |
| 24   | UNIV COPENHAGEN                | 1705                         |
| 25   | UNIV CHICAGO                   | 1611                         |
| 26   | UNIV N CAROLINA                | 1610                         |
| 27   | KAROLINSKA INST                | 1600                         |
| 28   | UNIV WISCONSIN                 | 1507                         |
| 29   | CALTECH                        | 1441                         |
| 30   | UNIV NORTHWESTERN              | 1429                         |
| 31   | UNIV ERASMUS MC                | 1409                         |
| 32   | UNIV PITTSBURGH                | 1392                         |
| 33   | UNIV TOKYO                     | 1380                         |
| 34   | HARVARD & MIT                  | 1358                         |
| 35   | UNIV EMORY                     | 1285                         |
| 36   | BAYLOR COLL MED                | 1267                         |
| 37   | UNIV NEW YORK                  | 1265                         |
| 38   | SORBONNE UNIV                  | 1205                         |
| 39   | UNIV MINNESOTA                 | 1198                         |
| 40   | UNIV EDINBURGH                 | 1195                         |
| 41   | UNIV UTRECHT                   | 1157                         |
| 42   | UNIV AMSTERDAM                 | 1149                         |
| 43   | CNRS                           | 1148                         |
| 44   | UNIV MARYLAND                  | 1140                         |
| 45   | UNIV BRITISH COLUMBIA          | 1125                         |
| 46   | UNIV MUNICH                    | 1123                         |
| 47   | UNIV ZURICH                    | 1112                         |
| 48   | UNIV MELBOURNE                 | 1098                         |
| 49   | UNIV VANDERBILT                | 1079                         |
| 50   | UNIV S CALIF                   | 1078                         |
| 51   | UNIV LEIDEN                    | 1078                         |
| 52   | UNIV MCGILL                    | 1066                         |
| 53   | UNIV BOSTON                    | 1063                         |
| 54   | UNIV HEIDELBERG                | 1059                         |
| 55   | HOWARD HUGHES MED INST         | 1049                         |
| 56   | UNIV OHIO STATE                | 1049                         |
| 57   | UNIV STATE NEW YORK            | 1040                         |
| 58   | UNIV SYDNEY                    | 1034                         |
| 59   | HELMHOLTZ ASSOC GERMAN RES CTR | 1017                         |
| 60   | INSERM                         | 1010                         |
| 61   | CHINESE ACAD SCI               | 1003                         |
| 62   | FRED HUTCHINSON CANC RES CTR   | 1002                         |
| 63   | UNIV PARIS DESCARTES           | 985                          |
| 64   | WELLCOME TRUST                 | 981                          |
| 65   | UNIV ALABAMA                   | 980                          |
| 66   | CLIN CLEVELAND                 | 976                          |
| 67   | UNIV GRONINGEN                 | 949                          |
| 68   | UNIV MANCHESTER                | 936                          |
| 69   | UNIV HELSINKI                  | 932                          |
| 70   | KU LEUVEN                      | 929                          |

|     |                             |     |
|-----|-----------------------------|-----|
| 71  | UNIV RABOUD NIJMEGEN        | 913 |
| 72  | UNIV MASSACHUSETTS          | 899 |
| 73  | UNIV ROCKEFELLER            | 893 |
| 74  | UNIV BRISTOL                | 892 |
| 75  | SCRIPPS RES INST            | 890 |
| 76  | UNIV UPPSALA                | 877 |
| 77  | UNIV UTAH                   | 875 |
| 78  | UNIV ARIZONA                | 860 |
| 79  | UNIV FREE AMSTERDAM         | 860 |
| 80  | UNIV OREGON                 | 857 |
| 81  | UNIV MCMASTER               | 854 |
| 82  | US DEPT OF ENERGY           | 851 |
| 83  | MED RES COUNCIL UK          | 837 |
| 84  | UNIV ILLINOIS               | 837 |
| 85  | UNIV INDIANA                | 835 |
| 86  | UNIV LEEDS                  | 823 |
| 87  | ROCHE                       | 820 |
| 88  | UNIV PRINCETON              | 816 |
| 89  | UNIV GLASGOW                | 810 |
| 90  | UNIV KYOTO                  | 796 |
| 91  | UNIV AARHUS                 | 787 |
| 92  | UNIV HOSP                   | 787 |
| 93  | UNIV VIENNA                 | 782 |
| 94  | CDC                         | 771 |
| 95  | UNIV PARIS DIDEROT          | 770 |
| 96  | UNIV TECH MUNICH            | 768 |
| 97  | UNIV QUEENSLAND             | 756 |
| 98  | CHILDRENS HOSP              | 755 |
| 99  | UNIV PARIS SACLAY           | 747 |
| 100 | UNIV BASEL                  | 734 |
| 101 | NASA                        | 728 |
| 102 | UNIV BIRMINGHAM             | 723 |
| 103 | UNIV NEWCASTLE              | 723 |
| 104 | RIKEN                       | 721 |
| 105 | UNIV OSLO                   | 721 |
| 106 | HOSP ST JUDE CHILDRENS RES  | 718 |
| 107 | UNIV BARCELONA              | 710 |
| 108 | UNIV PENN STATE             | 707 |
| 109 | LONDON SCH HYG & TROP MED   | 704 |
| 110 | UNIV ALBERTA                | 702 |
| 111 | UNIV BERN                   | 699 |
| 112 | HOSP UNIV CHARITE           | 696 |
| 113 | UNIV LUND                   | 693 |
| 114 | UNIV MONTREAL               | 691 |
| 115 | UNIV IOWA                   | 688 |
| 116 | EMBL                        | 686 |
| 117 | UNIV ROCHESTER              | 672 |
| 118 | UNIV LYON                   | 668 |
| 119 | UNIV VIRGINIA               | 668 |
| 120 | UNIV BROWN                  | 661 |
| 121 | UNIV CASE WESTERN RESERVE   | 661 |
| 122 | UNIV FLORIDA                | 654 |
| 123 | UNIV MONASH                 | 646 |
| 124 | UNIV HAMBURG                | 636 |
| 125 | NOVARTIS                    | 633 |
| 126 | SWISS FED INST TECHNOL EPFL | 630 |
| 127 | INST GUSTAVE ROUSSY         | 630 |
| 128 | ETH ZURICH                  | 627 |
| 129 | UNIV TUBINGEN               | 625 |
| 130 | UNIV FREIBURG               | 622 |
| 131 | WHO                         | 612 |
| 132 | INST PASTEUR                | 610 |
| 133 | UNIV GENEVA                 | 605 |
| 134 | UNIV LIVERPOOL              | 597 |
| 135 | UNIV SOUTHAMPTON            | 596 |
| 136 | JAPAN SCI & TECHNOL AGCY    | 581 |
| 137 | HOSP ROYAL MARSDEN          | 581 |
| 138 | UNIV LAUSANNE               | 579 |
| 139 | UNIV YESHIVA                | 575 |
| 140 | UNIV MIAMI                  | 574 |
| 141 | UNIV COLOGNE                | 573 |

|     |                             |     |
|-----|-----------------------------|-----|
| 142 | UNIV LEICESTER              | 571 |
| 143 | UNIV MILANO                 | 567 |
| 144 | UNIV PEKING                 | 565 |
| 145 | UNIV TUFTS                  | 557 |
| 146 | IMPERIAL COLL LONDON        | 549 |
| 147 | UNIV OSAKA                  | 531 |
| 148 | UNIV NATL SINGAPORE         | 529 |
| 149 | GERMAN CANC RES CTR         | 527 |
| 150 | UNIV TENNESSEE              | 526 |
| 151 | INST CANC RES               | 526 |
| 152 | UNIV WAKE FOREST            | 524 |
| 153 | UNIV CALGARY                | 524 |
| 154 | UNIV SEOUL NATL             | 524 |
| 155 | UNIV RUTGERS                | 513 |
| 156 | UNIV BONN                   | 509 |
| 157 | UNIV NEW SOUTH WALES        | 506 |
| 158 | UNIV TEL AVIV               | 505 |
| 159 | UNIV NOTTINGHAM             | 503 |
| 160 | UNIV MUNSTER                | 501 |
| 161 | GLAXOSMITHKLINE             | 496 |
| 162 | UNIV DUISBURG ESSEN         | 491 |
| 163 | WEIZMANN INST SCI           | 491 |
| 164 | UNIV ULM                    | 490 |
| 165 | UNIV HAWAII                 | 483 |
| 166 | UNIV OTTAWA                 | 480 |
| 167 | HOSP SICK CHILDREN          | 480 |
| 168 | UNIV LILLE                  | 479 |
| 169 | UNIV W AUSTRALIA            | 478 |
| 170 | UNIV HEBREW HADASSAH        | 464 |
| 171 | UNIV GOTHENBURG             | 463 |
| 172 | UNIV PADUA                  | 461 |
| 173 | UNIV GHENT                  | 461 |
| 174 | HOSP CHILDRENS PHILADELPHIA | 459 |
| 175 | UNIV SHEFFIELD              | 454 |
| 176 | SALK INST BIOL STUDIES      | 454 |
| 177 | CSIC                        | 452 |
| 178 | UNIV BORDEAUX               | 450 |
| 179 | KU LOUVAIN                  | 450 |
| 180 | UNIV HANNOVER               | 448 |
| 181 | UNIV ROMA LA SAPIENZA       | 447 |
| 182 | UNIV TORINO                 | 444 |
| 183 | PFIZER                      | 435 |
| 184 | UNIV WURZBURG               | 434 |
| 185 | UNIV MAASTRICHT             | 432 |
| 186 | UNIV BERGEN                 | 429 |
| 187 | KAISER PERMANENTE ORG       | 427 |
| 188 | NETHERLANDS CANC INST       | 423 |
| 189 | AMGEN INC                   | 420 |
| 190 | CONSIGLIO NAZL RIC CNR      | 419 |
| 191 | UNIV CARDIFF                | 416 |
| 192 | UNIV GOTTINGEN              | 414 |
| 193 | HOSP PRINCESS MARGARET      | 413 |
| 194 | UNIV MONTPELLIER            | 411 |
| 195 | UNIV FREE BRUXELLES         | 411 |
| 196 | COLD SPRING HARBOR LAB      | 409 |
| 197 | UNIV S CAROLINA             | 405 |
| 198 | MERCK                       | 402 |
| 199 | UNIV GEORGETOWN             | 400 |
| 200 | UNIV AUSTRALIAN NATL        | 399 |
