# Supplementary material for: Whose shoulders is health research standing on? Determining the key actors and contents of the prevailing biomedical research agenda
Source: PubMed Central journal article supplement (PMC8026021; doi:10.1371/journal.pone.0249661), 2021-04-07
Supplement: pone.0249661.s003.pdf [file pone.0249661.s003.pdf]

| <b>GLOBAL 1999-2008 (TOP JOURNALS)</b>                   |                                     |                   |
|----------------------------------------------------------|-------------------------------------|-------------------|
| <b>CATEGORY</b>                                          | <b>NUMBER OF DISTINCT DOCUMENTS</b> | <b>PERCENTAGE</b> |
| METHODS/TECHNIQUES/MODEL: HUMAN (LEVEL)                  | 9768                                | 19,1              |
| MOLECULAR FUNCTION/BIOLOGICAL PROCCES                    | 8002                                | 15,6              |
| CANCER/TUMOR                                             | 6831                                | 13,4              |
| MOLECULE/CHEMICAL STRUCTURE/PROTEIN                      | 5472                                | 10,7              |
| CARDIOVASCULAR                                           | 4282                                | 8,4               |
| METHODS/TECHNIQUES/MODEL: CHEM MOL AND CELL BIOL (LEVEL) | 3858                                | 7,5               |
| CELL TYPE/KIND                                           | 3298                                | 6,4               |
| IMMUNOLOGY                                               | 1704                                | 3,3               |
| METHODS/TECHNIQUES/MODEL: ANIMAL (LEVEL)                 | 1589                                | 3,1               |
| EVOLUTION/GENETICS/SYSTEMATICS                           | 1533                                | 3,0               |
| MICROBIOLOGY/APPLIED MICROBIOLOGY                        | 855                                 | 1,7               |
| CELLULAR COMPONENT                                       | 797                                 | 1,6               |
| NEUROLOGICAL/NEUROLOGICAL DISEASES/MENTAL HEALTH         | 766                                 | 1,5               |
| PATHOGENS                                                | 651                                 | 1,3               |
| METABOLIC SYNDROMES/DIABETES                             | 572                                 | 1,1               |
| BONE                                                     | 533                                 | 1,0               |
| ECOLOGY/ENVIRONMENTAL                                    | 317                                 | 0,6               |
| METHODS/TECHNIQUES/MODEL: PLANT (LEVEL)                  | 204                                 | 0,4               |
| SYSTEMS BIOLOGY                                          | 124                                 | 0,2               |
|                                                          |                                     |                   |
| <b>TOTAL</b>                                             | <b>51156</b>                        | <b>100,0</b>      |

| <b>GLOBAL 2009-2018 (TOP JOURNALS)</b>                   |                                     |                   |
|----------------------------------------------------------|-------------------------------------|-------------------|
| <b>CATEGORY</b>                                          | <b>NUMBER OF DISTINCT DOCUMENTS</b> | <b>PERCENTAGE</b> |
| METHODS/TECHNIQUES/MODEL: HUMAN (LEVEL)                  | 11524                               | 19,5              |
| MOLECULAR FUNCTION/BIOLOGICAL PROCCES                    | 9210                                | 15,6              |
| CANCER/TUMOR                                             | 8370                                | 14,2              |
| MOLECULE/CHEMICAL STRUCTURE/PROTEIN                      | 5488                                | 9,3               |
| METHODS/TECHNIQUES/MODEL: CHEM MOL AND CELL BIOL (LEVEL) | 4976                                | 8,4               |
| CARDIOVASCULAR                                           | 4502                                | 7,6               |
| CELL TYPE/KIND                                           | 3997                                | 6,8               |
| EVOLUTION/GENETICS/SYSTEMATICS                           | 2463                                | 4,2               |
| IMMUNOLOGY                                               | 2020                                | 3,4               |
| METHODS/TECHNIQUES/MODEL: ANIMAL (LEVEL)                 | 1885                                | 3,2               |
| NEUROLOGICAL/NEUROLOGICAL DISEASES/MENTAL HEALTH         | 829                                 | 1,4               |
| MICROBIOLOGY/APPLIED MICROBIOLOGY                        | 751                                 | 1,3               |
| CELLULAR COMPONENT                                       | 737                                 | 1,2               |
| PATHOGENS                                                | 603                                 | 1,0               |
| BONE                                                     | 519                                 | 0,9               |
| METABOLIC SYNDROMES/DIABETES                             | 504                                 | 0,9               |
| ECOLOGY/ENVIRONMENTAL                                    | 335                                 | 0,6               |
| SYSTEMS BIOLOGY                                          | 204                                 | 0,3               |
| METHODS/TECHNIQUES/MODEL: PLANT (LEVEL)                  | 169                                 | 0,3               |
|                                                          |                                     |                   |
| <b>TOTAL</b>                                             | <b>59086</b>                        | <b>100,0</b>      |
