# Supplementary material for: Whose shoulders is health research standing on? Determining the key actors and contents of the prevailing biomedical research agenda
Source: PubMed Central journal article supplement (PMC8026021; doi:10.1371/journal.pone.0249661), 2021-04-07
Supplement: pone.0249661.s005.pdf [file pone.0249661.s005.pdf]

| Stem                             | Main form                                 | Forms                                                                                                                                                                                                                                                   | n | C-value     | Gfidf        | Specificity chi2 | Occurrences | Cooccurrences |
|----------------------------------|-------------------------------------------|---------------------------------------------------------------------------------------------------------------------------------------------------------------------------------------------------------------------------------------------------------|---|-------------|--------------|------------------|-------------|---------------|
| 30-day mortal                    | 30-day mortality                          | 30-day mortality                                                                                                                                                                                                                                        | 2 | 511.4327973 | 1.775956284  | 1808.995139      | 183         | 2466          |
| absolut differ                   | absolute difference                       | absolute difference                                                                                                                                                                                                                                     | 2 | 456.3554192 | 1.33640553   | 1177.067133      | 225         | 2911          |
| acid amino                       | amino acids                               | amino acids& amino acid                                                                                                                                                                                                                                 | 2 | 854.4861814 | 1.21205371   | 2810.390228      | 448         | 1777          |
| activ anti tumor                 | antitumor activity                        | antitumor activity                                                                                                                                                                                                                                      | 2 | 704.9904406 | 1.172774989  | 6436.874687      | 382         | 5468          |
| activ kinas                      | kinase activity                           | kinase activity& activity of the kinase                                                                                                                                                                                                                 | 2 | 428.0299104 | 1.119341564  | 3541.383915      | 243         | 1554          |
| activ physic                     | physical activity                         | physical activity                                                                                                                                                                                                                                       | 2 | 1021.291955 | 1.739946381  | 3518.714405      | 373         | 4348          |
| activ site                       | active site                               | active site& active sites                                                                                                                                                                                                                               | 2 | 837.1761482 | 1.245901639  | 2152.75596       | 427         | 1731          |
| activ transcript                 | transcriptional activation                | transcriptional activation& transcriptional activity                                                                                                                                                                                                    | 2 | 546.0528636 | 1.087774295  | 5678.469058      | 319         | 1709          |
| acut coronari patient syndrom    | patients with acute coronary syndromes    | patients with acute coronary syndromes& patients with acute coronary syndrome& acute coronary syndrome patients& patients with an acute coronary syndrome& acute coronary syndromes in patients& acute coronary syndrome in patients& p                 | 5 | 415.0137679 | 1.142076503  | 8916.926671      | 183         | 2273          |
| acut coronari syndrom            | acute coronary syndromes                  | acute coronary syndromes& acute coronary syndrome                                                                                                                                                                                                       | 3 | 1799.054898 | 1.143939394  | 3333.231888      | 912         | 9497          |
| acut infarct myocardi            | acute myocardial infarction               | acute myocardial infarction                                                                                                                                                                                                                             | 3 | 2388.811305 | 1.309031556  | 3068.726215      | 1036        | 10257         |
| acut infarct myocardi patient    | patients with acute myocardial infarction | patients with acute myocardial infarction& acute myocardial infarction in patients& patients with an acute myocardial infarction& acute myocardial infarction patients& patients after acute myocardial infarction& patients without acute myocardial i | 5 | 413.028056  | 1.155555556  | 9178.94607       | 180         | 2109          |
| acut leukemia lymphoblast        | acute lymphoblastic leukemia              | acute lymphoblastic leukemia& Acute Lymphoblastic Leukemia& Lymphoblastic Acute Leukemia                                                                                                                                                                | 3 | 921.3702789 | 1.045045045  | 1553.866988      | 531         | 4402          |
| acut leukemia myeloid            | acute myeloid leukemia                    | acute myeloid leukemia& Acute Myeloid Leukemia                                                                                                                                                                                                          | 3 | 1231.141321 | 1.024793388  | 40621.73983      | 605         | 6108          |
| adapt immun                      | adaptive immunity                         | adaptive immunity& adaptive immune                                                                                                                                                                                                                      | 2 | 513.0064367 | 1.143859649  | 13802.59288      | 364         | 2218          |
| adenocarcinoma lung              | lung adenocarcinoma                       | lung adenocarcinoma& lung adenocarcinomas& adenocarcinoma of the lung& adenocarcinomas of the lung& adenocarcinoma of lung                                                                                                                              | 2 | 454.7817798 | 1.1710059172 | 1897.545914      | 169         | 1634          |
| adjust hazard ratio              | adjusted hazard ratio                     | adjusted hazard ratio& adjusted hazard ratios                                                                                                                                                                                                           | 3 | 1356.241185 | 1.171528587  | 3655.751979      | 583         | 9060          |
| adjust hr                        | adjusted HR                               | adjusted HR                                                                                                                                                                                                                                             | 2 | 401.272841  | 1.383636364  | 2422.875069      | 187         | 3039          |
| adjust odd ratio                 | adjusted odds ratio                       | adjusted odds ratio                                                                                                                                                                                                                                     | 3 | 4175.54139  | 1.145067698  | 7863.866798      | 517         | 6376          |
| adjuv chemotherapi               | adjuvant chemotherapy                     | adjuvant chemotherapy& Adjuvant chemotherapy& Adjuvant Chemotherapy& chemotherapy in the adjuvant& Chemotherapy as Adjuvant                                                                                                                             | 2 | 1647.600427 | 1.546528804  | 2216.286132      | 677         | 8459          |
| adjuv therapi                    | adjuvant therapy                          | adjuvant therapy                                                                                                                                                                                                                                        | 2 | 708.1377194 | 1.282051282  | 1739.939305      | 362         | 4680          |
| adjuv treatment                  | adjuvant treatment                        | adjuvant treatment& treatment in the adjuvant                                                                                                                                                                                                           | 2 | 557.0683392 | 1.195945946  | 1436.223407      | 296         | 3850          |
| advers common event              | common adverse events                     | common adverse events                                                                                                                                                                                                                                   | 3 | 532.1707645 | 1.011320755  | 1975.321603      | 265         | 4190          |
| advers event                     | adverse events                            | adverse events& Adverse events& adverse event& events adverse                                                                                                                                                                                           | 2 | 5097.01794  | 1.271692187  | 9186.426834      | 2765        | 39060         |
| advers event seriou              | serious adverse events                    | serious adverse events& Serious adverse events& serious adverse event                                                                                                                                                                                   | 3 | 2362.997051 | 1.119473189  | 5996.003576      | 1063        | 14932         |
| age children                     | children aged                             | children aged& aged children                                                                                                                                                                                                                            | 2 | 597.982963  | 1.279461279  | 1270.974188      | 297         | 2562          |
| age gestat                       | gestational age                           | gestational age                                                                                                                                                                                                                                         | 2 | 539.7583061 | 1.566210046  | 1300.102893      | 219         | 2191          |
| age median                       | median age                                | median age& Median age                                                                                                                                                                                                                                  | 2 | 1795.522528 | 1.03164557   | 2820.190171      | 1106        | 15165         |
| age patient                      | patients aged                             | patients aged& patient age& patients age& Patients aged& age of the patients& aged patients& age of the patient& age of patients& patients of any age& age in patients& patients below the age& patients under the age& patients on age& p              | 2 | 1686.941411 | 1.105154639  | 1161.805622      | 970         | 13459         |
| age women                        | women aged                                | women aged& women age& aged women& women under the age& women over the age& age in women& women across age& women at the age& women and age& women between the age& women by age& age among women                                                       | 2 | 1048.043825 | 1.273422562  | 1962.365083      | 523         | 6493          |
| aim studi                        | aim of this study                         | aim of this study& aim of the study& study aim& aim in this study& study with the aim& aim this study                                                                                                                                                   | 4 | 867.0752964 | 1            | 1935.421759      | 551         | 8066          |
| alcohol consumpt                 | alcohol consumption                       | alcohol consumption& consumption of alcohol                                                                                                                                                                                                             | 2 | 481.5336492 | 1.709497207  | 1473.226833      | 178         | 2037          |
| all-caus mortal                  | all-cause mortality                       | all-cause mortality& All-cause mortality                                                                                                                                                                                                                | 2 | 2198.374209 | 1.64159612   | 2901.942254      | 851         | 12181         |
| alloct treatment                 | treatment allocation                      | treatment allocation                                                                                                                                                                                                                                    | 2 | 530.3164698 | 1.024316109  | 3072.024386      | 329         | 4684          |
| american cancer societi          | American Cancer Society                   | American Cancer Society& Cancer From the American Society                                                                                                                                                                                               | 3 | 536.1421881 | 1.210762332  | 1359.399553      | 223         | 2186          |
| american clinic oncology societi | American Society of Clinical Oncology     | American Society of Clinical Oncology& American Society for Clinical Oncology& Clinical Oncology and American Society                                                                                                                                   | 5 | 10150.95876 | 1.016302187  | 43504.27596      | 5030        | 64751         |
| analsi intention-to-treat        | intention-to-treat analysis               | intention-to-treat analysis                                                                                                                                                                                                                             | 2 | 586.9674874 | 1.068767908  | 1382.217369      | 349         | 4424          |
| analsi interim                   | interim analysis                          | interim analysis                                                                                                                                                                                                                                        | 2 | 484.6809279 | 1.171102662  | 1170.966455      | 263         | 3835          |
| analsi multivari                 | multivariate analysis                     | multivariate analysis& multivariable analysis& Multivariate analysis& Multivariable analysis                                                                                                                                                            | 2 | 2549.29579  | 1.084337349  | 5913.312063      | 1494        | 19369         |
| analsi primari                   | primary analysis                          | primary analysis                                                                                                                                                                                                                                        | 2 | 561.7892574 | 1.108695652  | 1265.985986      | 322         | 4617          |
| analsi regress                   | regression analysis                       | regression analysis                                                                                                                                                                                                                                     | 2 | 484.6809279 | 1.01650165   | 3117.206485      | 619         | 8193          |
| angina unstabl                   | unstable angina                           | unstable angina                                                                                                                                                                                                                                         | 2 | 604.2775205 | 1.342657343  | 2327.713625      | 286         | 3889          |
| angiographi coronari             | coronary angiography                      | coronary angiography                                                                                                                                                                                                                                    | 2 | 535.037388  | 1.259259259  | 3040.422326      | 270         | 2804          |
| angstrom resolut                 | angstrom resolution                       | angstrom resolution& Angstrom resolution                                                                                                                                                                                                                | 2 | 1026.012873 | 1.028391167  | 37624.19872      | 634         | 2709          |
| antibodi monoclon                | monoclonal antibody                       | monoclonal antibody& monoclonal antibodies                                                                                                                                                                                                              | 2 | 1137.741289 | 1.105504587  | 1726.4466        | 654         | 7031          |
| antibodi respons                 | antibody responses                        | antibody responses& antibody response                                                                                                                                                                                                                   | 2 | 421.7353529 | 1.307317073  | 2709.633544      | 205         | 1421          |
| antigen prostate-specif          | prostate-specific antigen                 | prostate-specific antigen                                                                                                                                                                                                                               | 2 | 709.7113587 | 1.036781609  | 9230.909396      | 435         | 5285          |
| antiretrovir therapi             | antiretroviral therapy                    | antiretroviral therapy                                                                                                                                                                                                                                  | 2 | 786.8196882 | 1.404494382  | 3414.671463      | 357         | 3318          |
| apoptot cell                     | apoptotic cells                           | apoptotic cells& apoptotic cell                                                                                                                                                                                                                         | 2 | 407.5725985 | 1.692810458  | 6657.187766      | 153         | 898           |
| arabidopsis thaliana             | Arabidopsis thaliana                      | Arabidopsis thaliana                                                                                                                                                                                                                                    | 2 | 689.2540469 | 1.00228833   | 2963.845777      | 437         | 1665          |
| arm b                            | arm B                                     | arm B& B arm                                                                                                                                                                                                                                            | 2 | 634.1766687 | 2.779310345  | 1639.907475      | 145         | 2140          |
| arm treatment                    | treatment arms                            | treatment arms& treatment arm& treatment in both arms& arm A treatment& treatment in each arm& treatment on both arms                                                                                                                                   | 2 | 582.2465693 | 1.241610738  | 1638.253089      | 298         | 4202          |
| arteri coronari                  | coronary artery                           | coronary artery& coronary arteries& artery coronary                                                                                                                                                                                                     | 2 | 878.090772  | 1.17721519   | 3625.220307      | 489         | 5001          |
| arteri coronari disease          | coronary artery disease                   | coronary artery disease                                                                                                                                                                                                                                 | 3 | 2148.540176 | 1.192943771  | 36989.5011       | 1027        | 11052         |
| artery disease                   | artery disease                            | artery disease                                                                                                                                                                                                                                          | 2 | 618.4402749 | 1.267741935  | 37935.44053      | 1400        | 14840         |
| assess patient                   | assessable patients                       | assessable patients& patients assessable                                                                                                                                                                                                                | 2 | 549.2001424 | 1.122186495  | 4029.289483      | 311         | 4344          |
| assign patient                   | assigned patients                         | assigned patients& patients assigned                                                                                                                                                                                                                    | 2 | 777.3778519 | 1.066954644  | 1921.3192        | 463         | 6508          |
| assign treatment                 | treatment assignment                      | treatment assignment& assigned treatment                                                                                                                                                                                                                | 2 | 552.3474211 | 1.038461538  | 3215.118125      | 338         | 4911          |
| associ genome-wid studi          | genome-wide association study             | genome-wide association study& genome-wide association studies& Genome-wide association study& Genome-wide association studies                                                                                                                          | 3 | 2023.440332 | 1.040858018  | 157827.5081      | 979         | 8162          |
| associ signific                  | significant association                   | significant association& significant associations                                                                                                                                                                                                       | 2 | 745.9050644 | 1.079726651  | 2208.01198       | 439         | 5087          |
| associ studi                     | association study                         | association study& association studies& study the association& study of the association& study of association                                                                                                                                           | 2 | 505.1382398 | 1.110726644  | 125180.5808      | 1246        | 10007         |
| atlant north                     | North Atlantic                            | North Atlantic                                                                                                                                                                                                                                          | 2 | 585.393848  | 1.367647059  | 6610.261866      | 322         | 1350          |
| atrial fibril                    | atrial fibrillation                       | atrial fibrillation& Atrial fibrillation                                                                                                                                                                                                                | 2 | 2281.777096 | 1.410505837  | 1540.89044       | 1128        | 10281         |
| atrial fibril patient            | patients with atrial fibrillation         | patients with atrial fibrillation& atrial fibrillation patients& atrial fibrillation in patients& patients without atrial fibrillation& patients in atrial fibrillation& atrial fibrillation in some patients& atrial patients fibrillation             | 4 | 476.5708339 | 1.318681319  | 8424.1287        | 182         | 1995          |
| autoimmun disease                | autoimmune disease                        | autoimmune disease& autoimmune diseases                                                                                                                                                                                                                 | 2 | 535.037388  | 1.188811189  | 3462.485798      | 286         | 1888          |
| autolog stem-cell transplant     | autologous stem-cell transplantation      | autologous stem-cell transplantation                                                                                                                                                                                                                    | 3 | 418.9851915 | 1.159340659  | 11698.94005      | 182         | 2385          |
| b cell                           | B cells                                   | B cells& B cell                                                                                                                                                                                                                                         | 2 | 1756.181544 | 1.746478873  | 5258.11272       | 639         | 3733          |
| b nf-kappa                       | NF-kappa B                                | NF-kappa B                                                                                                                                                                                                                                              | 2 | 741.1841463 | 1.635416667  | 2926.706718      | 323         | 2258          |
| base pair                        | base pairs                                | base pairs& base pair                                                                                                                                                                                                                                   | 2 | 539.7583061 | 1.166666667  | 3642.634546      | 294         | 1207          |
| bas genet                        | genetic basis                             | genetic basis                                                                                                                                                                                                                                           | 2 | 446.9135829 | 1.04029304   | 1896.651022      | 273         | 1521          |
| bas molecular                    | molecular basis                           | molecular basis                                                                                                                                                                                                                                         | 2 | 804.1297213 | 1.013888889  | 3200.533986      | 504         | 2300          |
| bas structur                     | Structural basis                          | Structural basis& structural basis& Structural Basis                                                                                                                                                                                                    | 2 | 914.2844777 | 1.015734266  | 3995.855816      | 572         | 2954          |
| b-cell lymphoma                  | B-cell lymphoma                           | B-cell lymphoma& B-Cell Lymphoma& B-cell lymphomas& lymphoma and B-cell                                                                                                                                                                                 | 2 | 520.8746336 | 1.151410509  | 1138.831986      | 418         | 3931          |
| beneficiari medicar              | Medicare beneficiaries                    | Medicare beneficiaries                                                                                                                                                                                                                                  | 2 | 415.4407954 | 1.534883721  | 1437.894878      | 172         | 1976          |
| bind protein                     | binding protein                           | binding protein& binding proteins& protein binding                                                                                                                                                                                                      | 2 | 505.1382398 | 1.035483871  | 2770.699151      | 310         | 1456          |
| bind site                        | binding sites                             | binding sites& binding site                                                                                                                                                                                                                             | 2 | 1054.338382 | 1.107438017  | 8679.383621      | 605         | 2895          |
| biolog system                    | systems biology                           | systems biology& biological systems                                                                                                                                                                                                                     | 2 | 418.5880741 | 1.055555556  | 1441.24808       | 252         | 830           |
| black hole                       | black holes                               | black holes& black hole                                                                                                                                                                                                                                 | 2 | 731.74231   | 1.890243902  | 2206.328887      | 246         | 751           |
| block size                       | block size                                | block size& block sizes                                                                                                                                                                                                                                 | 2 | 405.9989591 | 1.0078125    | 3364.744122      | 256         | 3881          |
| blood diastol pressur            | diastolic blood pressure                  | diastolic blood pressure                                                                                                                                                                                                                                | 3 | 446.7851568 | 1.315789474  | 4502.994576      | 171         | 2546          |
| blood peripher                   | peripheral blood                          | peripheral blood                                                                                                                                                                                                                                        | 2 | 505.1382398 | 1.206766917  | 1487.988251      | 266         | 2641          |

|                            |                                |                                |   |             |             |             |      |       |
|----------------------------|--------------------------------|--------------------------------|---|-------------|-------------|-------------|------|-------|
| blood pressure             | blood pressure                 | blood pressure                 | 2 | 2851.43455  | 1.653284672 | 4452.426003 | 1415 | 16380 |
| blood pressure systolic    | systolic blood pressure        | systolic blood pressure        | 3 | 1195.398508 | 1.436754177 | 10934.79322 | 419  | 6227  |
| body index mass            | body mass index                | body mass index                | 3 | 2005.568926 | 1.175785797 | 30633.46784 | 859  | 11935 |
| body kilogram weight       | kilogram of body weight        | kilogram of body weight        | 4 | 424.9423269 | 1.004694836 | 16458.4345  | 213  | 2712  |
| body weight                | body weight                    | body weight                    | 2 | 739.050669  | 1.323943062 | 15063.4345  | 5607 | 6507  |
| body-mass index            | body-mass index                | body-mass index                | 2 | 536.6110273 | 1.171821306 | 1284.692077 | 291  | 3207  |
| bone marrow                | bone marrow                    | bone marrow                    | 2 | 2097.661289 | 1.395811518 | 3629.687207 | 1123 | 10108 |
| brain metastases           | brain metastases               | brain metastases               | 2 | 509.8591579 | 2.117647059 | 1188.12116  | 153  | 2051  |
| break dna double-strand    | DNA double-strand breaks       | DNA double-strand breaks       | 3 | 399.1280734 | 1.036082474 | 4444.531731 | 194  | 1175  |
| breast cancer              | breast cancer                  | breast cancer                  | 2 | 9575.595605 | 1.568703274 | 13142.24251 | 5347 | 52589 |
| breast cancer early-stage  | early-stage breast cancer      | early-stage breast cancer      | 3 | 623.5135077 | 1.308333333 | 2741.526075 | 240  | 2975  |
| breast cancer invas        | invasive breast cancer         | invasive breast cancer         | 3 | 474.5851221 | 1.278074866 | 1999.991753 | 187  | 2528  |
| breast cancer metastat     | metastatic breast cancer       | metastatic breast cancer       | 3 | 1268.869845 | 1.298780488 | 6556.031798 | 595  | 7570  |
| breast cancer patient      | breast cancer patients         | breast cancer patients         | 3 | 1395.955401 | 1.309124767 | 11682.75247 | 556  | 6966  |
| breast cancer risk         | breast cancer risk             | breast cancer risk             | 3 | 724.7848099 | 1.477732794 | 10257.37721 | 254  | 3143  |
| c degre                    | degrees C                      | degrees C                      | 2 | 920.5790352 | 1.280087527 | 2716.670423 | 457  | 1865  |
| Caenorhabdit elegans       | Caenorhabditis elegans         | Caenorhabditis elegans         | 2 | 1145.609466 | 1.004137931 | 5346.149921 | 725  | 2885  |
| cancer care                | cancer care                    | cancer care                    | 2 | 623.161193  | 1.306930693 | 1405.116987 | 303  | 2546  |
| cancer cell                | cancer cells                   | cancer cells                   | 2 | 1948.165548 | 1.354485777 | 10639.11253 | 1140 | 8996  |
| cancer cell line           | cancer cell lines              | cancer cell lines              | 3 | 416.9994797 | 1.09375     | 30839.38302 | 192  | 1736  |
| cancer center              | Cancer Center                  | Cancer Center                  | 2 | 445.3399435 | 1.150406504 | 1076.032896 | 308  | 3768  |
| cancer colon               | colon cancer                   | colon cancer                   | 2 | 1014.997398 | 1.449438202 | 1605.908259 | 495  | 4838  |
| cancer colorect metastat   | metastatic colorectal cancer   | metastatic colorectal cancer   | 3 | 790.3132995 | 1.363013699 | 9278.751389 | 292  | 3755  |
| cancer death               | cancer death                   | cancer death                   | 2 | 487.8282067 | 1.606217617 | 1129.812566 | 211  | 2715  |
| cancer diagnosi            | cancer diagnosis               | cancer diagnosis               | 2 | 475.2309117 | 1.290598291 | 1256.385974 | 300  | 3687  |
| cancer human               | human cancers                  | human cancers                  | 2 | 698.6958931 | 1.126903553 | 5878.750116 | 394  | 2695  |
| cancer incid               | cancer incidence               | cancer incidence               | 2 | 637.3239474 | 1.563706564 | 3050.539204 | 308  | 4034  |
| cancer lung                | lung cancer                    | lung cancer                    | 2 | 2609.094086 | 1.615984405 | 25070.71868 | 2696 | 29302 |
| cancer lung non-small-cell | non-small-cell lung cancer     | non-small-cell lung cancer     | 3 | 2781.982243 | 1.097962382 | 24941.28262 | 1479 | 17842 |
| cancer lung small-cell     | small-cell lung cancer         | small-cell lung cancer         | 3 | 548.056459  | 1.215859031 | 4433.334973 | 227  | 2742  |
| cancer mortal              | cancer mortality               | cancer mortality               | 2 | 448.4872223 | 1.4843475   | 1379.530869 | 251  | 3169  |
| cancer patient             | cancer patients                | cancer patients                | 2 | 2214.110903 | 1.292911019 | 9226.34537  | 1643 | 16649 |
| cancer prostat             | prostate cancer                | prostate cancer                | 2 | 4286.559361 | 1.731722823 | 1314.214556 | 1875 | 17156 |
| cancer registri            | Cancer Registry                | Cancer Registry                | 2 | 459.5026979 | 1.081481841 | 1143.11303  | 270  | 3369  |
| cancer risk                | cancer risk                    | cancer risk                    | 2 | 780.5251307 | 1.301837277 | 2119.788082 | 612  | 6628  |
| cancer survivor            | cancer survivors               | cancer survivors               | 2 | 676.6649318 | 1.569343066 | 1546.867592 | 516  | 5196  |
| cancer therapi             | cancer therapy                 | cancer therapy                 | 2 | 525.5955517 | 1.098684211 | 1421.432456 | 304  | 2531  |
| cancer treatment           | cancer treatment               | cancer treatment               | 2 | 911.1371989 | 1.10707457  | 1199.500687 | 649  | 6737  |
| candid gene                | candidate genes                | candidate genes                | 2 | 623.161193  | 1.112359551 | 3099.122916 | 356  | 2212  |
| carbon dioxide             | carbon dioxide                 | carbon dioxide                 | 2 | 884.3853295 | 1.28604119  | 7278.55328  | 545  | 1945  |
| carbon nanotub             | carbon nanotubes               | carbon nanotubes               | 2 | 958.3463802 | 1.282105263 | 1316.968643 | 559  | 1852  |
| carcinoma cell             | cell carcinoma                 | cell carcinoma                 | 2 | 907.9899202 | 1.140316206 | 1611.606401 | 1010 | 10667 |
| carcinoma cell renal       | renal cell carcinoma           | renal cell carcinoma           | 3 | 440.8280214 | 1.150259067 | 12260.18753 | 277  | 3392  |
| carcinoma cell squamou     | squamous cell carcinoma        | squamous cell carcinoma        | 3 | 599.684966  | 1.170542636 | 11200.57921 | 258  | 3313  |
| cardiac death              | cardiac death                  | cardiac death                  | 2 | 396.5571228 | 1.37704918  | 2206.825423 | 184  | 2554  |
| cardiolog european societi | European Society of Cardiology | European Society of Cardiology | 4 | 1828.840575 | 1.006557377 | 8786.08366  | 915  | 9246  |
| cardiomyopathi dilat       | dilated cardiomyopathy         | dilated cardiomyopathy         | 2 | 497.2700429 | 1.284552846 | 1443.924818 | 246  | 1892  |
| cardiovascular death       | cardiovascular death           | cardiovascular death           | 2 | 621.5875537 | 1.42599278  | 2721.413187 | 277  | 4315  |
| cardiovascular disease     | cardiovascular disease         | cardiovascular disease         | 2 | 2730.264318 | 1.33976834  | 5428.70112  | 1374 | 15775 |
| cardiovascular event       | cardiovascular events          | cardiovascular events          | 2 | 1112.563039 | 1.38627451  | 2464.212538 | 544  | 7526  |
| cardiovascular factor risk | cardiovascular risk factors    | cardiovascular risk factors    | 3 | 563.9421534 | 1.198312236 | 3896.601957 | 237  | 3084  |
| cardiovascular mortal      | cardiovascular mortality       | cardiovascular mortality       | 2 | 613.7193568 | 1.488549618 | 2065.640337 | 272  | 3560  |
| cardiovascular risk        | cardiovascular risk            | cardiovascular risk            | 2 | 468.9445342 | 1.150579151 | 1686.125311 | 259  | 3145  |
| care health                | health care                    | health care                    | 2 | 2423.40464  | 1.37254902  | 1993.787456 | 1323 | 10951 |
| care intens unit           | intensive care unit            | intensive care unit            | 3 | 911.4417198 | 1.217506631 | 26177.82897 | 377  | 4679  |
| care primari               | primary care                   | primary care                   | 2 | 898.5480839 | 1.280269058 | 1398.220788 | 446  | 4118  |
| care quali                 | quality of care                | quality of care                | 3 | 457.9290585 | 1.310810811 | 1394.60032  | 222  | 2090  |
| care unit                  | care unit                      | care unit                      | 2 | 468.9445342 | 1.216326531 | 2530.280631 | 589  | 7032  |
| care usual                 | usual care                     | usual care                     | 2 | 1057.485661 | 1.92        | 2842.566401 | 350  | 4624  |
| carrier mutat              | mutation carriers              | mutation carriers              | 2 | 582.6845693 | 1.787439614 | 1394.50052  | 237  | 2305  |
| case-control studi         | case-control study             | case-control study             | 2 | 1104.694842 | 1.114285714 | 3238.744244 | 727  | 6923  |
| caus death                 | death from any cause           | death from any cause           | 4 | 1060.63294  | 1.281368821 | 1401.607767 | 535  | 7303  |
| caus mortal                | cause mortality                | cause mortality                | 2 | 465.7972554 | 1.85        | 1640.437697 | 160  | 2409  |
| cd4 cell count             | CD4 cell count                 | CD4 cell count                 | 3 | 476.5708339 | 1.983471074 | 1261.729137 | 121  | 1661  |
| cell cultur                | cell culture                   | cell culture                   | 2 | 568.0838149 | 1.046376812 | 1907.605199 | 345  | 1746  |
| cell cycl                  | cell cycle                     | cell cycle                     | 2 | 1306.120682 | 1.263318113 | 9222.787491 | 806  | 4873  |
| cell death                 | cell death                     | cell death                     | 2 | 1528.003834 | 1.254521964 | 4925.218713 | 841  | 4881  |
| cell dendrit               | dendritic cells                | dendritic cells                | 2 | 1139.314909 | 1.288256228 | 8628.618588 | 562  | 3385  |
| cell differenti            | cell differentiation           | cell differentiation           | 2 | 618.4402749 | 1.11965812  | 4557.048939 | 351  | 1971  |
| cell divis                 | cell division                  | cell division                  | 2 | 1046.470185 | 1.238361266 | 4577.267766 | 537  | 2382  |
| cell endotheli             | endothelial cells              | endothelial cells              | 2 | 863.9280176 | 1.369077307 | 2245.522275 | 401  | 2402  |
| cell epitheli              | epithelial cells               | epithelial cells               | 2 | 610.572078  | 1.208722741 | 1581.805193 | 321  | 1767  |
| cell es                    | ES cells                       | ES cells                       | 2 | 676.6649318 | 2.216484845 | 3980.53482  | 194  | 939   |
| cell fate                  | cell fate                      | cell fate                      | 2 | 810.4242788 | 1.2004862   | 6588.821803 | 428  | 2149  |
| cell germ                  | germ cell                      | germ cell                      | 2 | 919.0053958 | 1.420924574 | 5730.601973 | 514  | 3746  |
| cell growth                | cell growth                    | cell growth                    | 2 | 626.3084718 | 1.07277628  | 4417.032389 | 371  | 2291  |
| cell host                  | host cells                     | host cells                     | 2 | 632.6030293 | 1.252336449 | 2598.676428 | 321  | 1320  |
| cell human                 | human cells                    | human cells                    | 2 | 915.8581171 | 1.100189036 | 3742.168175 | 529  | 2484  |
| cell line                  | cell lines                     | cell lines                     | 2 | 1833.289873 | 1.181541582 | 11452.509   | 1136 | 7471  |
| cell live                  | living cells                   | living cells                   | 2 | 621.5875537 | 1.131805158 | 2290.509475 | 349  | 1435  |
| cell mammalian             | mammalian cells                | mammalian cells                | 2 | 1010.27648  | 1.07        | 5977.230124 | 600  | 2687  |
| cell membran               | cell membrane                  | cell membrane                  | 2 | 396.5571228 | 1.125       | 3335.703691 | 224  | 1028  |

|                                     |                                            |                                                                                                                                                                                                                              |             |             |             |             |      |       |
|-------------------------------------|--------------------------------------------|------------------------------------------------------------------------------------------------------------------------------------------------------------------------------------------------------------------------------|-------------|-------------|-------------|-------------|------|-------|
| cell popul                          | cell populations                           | cell populations &cell population                                                                                                                                                                                            | 2           | 725.4477525 | 1.127139364 | 4574.66855  | 409  | 2094  |
| cell progenitor                     | progenitor cells                           | progenitor cells &progenitor cell &cell progenitor                                                                                                                                                                           | 2           | 1428.864554 | 1.32748538  | 3773.0413   | 684  | 4052  |
| cell prolifer                       | cell proliferation                         | cell proliferation                                                                                                                                                                                                           | 2           | 963.0672983 | 1.112727273 | 5229.20862  | 550  | 3808  |
| cell singl                          | single cells                               | single cells                                                                                                                                                                                                                 | 2           | 440.8190254 | 1.142857143 | 2302.342547 | 245  | 1115  |
| cell surfac                         | cell surface                               | cell surface &surface cell                                                                                                                                                                                                   | 2           | 760.0678198 | 1.13915093  | 2485.198596 | 424  | 2031  |
| cell                                | T cells                                    | T cells &T cell &T Cells &cells T                                                                                                                                                                                            | 2           | 5554.948999 | 1.765882941 | 13967.76355 | 2348 | 14437 |
| cell tumor                          | tumor cells                                | tumor cells &tumor cell &cell tumors &cell tumor &cells within a tumor &cells in the tumor                                                                                                                                   | 2           | 1814.406201 | 1.351699883 | 2981.447793 | 966  | 8900  |
| cell tumour                         | tumour cells                               | tumour cells &tumour cell &cell tumour &cells within a tumour                                                                                                                                                                | 2           | 706.56408   | 1.522033998 | 2528.217005 | 295  | 2384  |
| cell type                           | cell types                                 | cell types &cell type &type of cell &type cell                                                                                                                                                                               | 2           | 1899.382727 | 1.231632653 | 6569.347028 | 1030 | 4941  |
| central nervous system              | central nervous system                     | central nervous system                                                                                                                                                                                                       | 3           | 990.8701921 | 1.063965885 | 1292.192088 | 469  | 2336  |
| central role                        | central role                               | central role                                                                                                                                                                                                                 | 2           | 535.037388  | 1.00591716  | 1709.789356 | 338  | 1650  |
| cerevisia saccharomyc               | Saccharomyces cerevisiae                   | Saccharomyces cerevisiae                                                                                                                                                                                                     | 2           | 859.2070995 | 1.001834862 | 5029.901892 | 679  | 2937  |
| chain polymeras reactio             | polymerase chain reaction                  | polymerase chain reaction                                                                                                                                                                                                    | 3           | 867.7560601 | 1.030660377 | 1600.906704 | 550  | 5983  |
| chang climat                        | climate change                             | climate change &climate changes &change in climate &changes in climate &change with climate &climate of change &changes in the climate &change from a climate                                                                | 2           | 1254.190583 | 1.261075949 | 7465.934189 | 632  | 2140  |
| chang conform                       | conformational changes                     | conformational changes &conformational change &changes conformational                                                                                                                                                        | 2           | 670.3703743 | 1.097938144 | 10288.41582 | 388  | 1549  |
| channel ion                         | ion channels                               | ion channels &ion channel &channel ion                                                                                                                                                                                       | 2           | 862.3543783 | 1.330097087 | 2397.715935 | 412  | 1659  |
| chemotherapi high-dos               | high-dose chemotherapy                     | high-dose chemotherapy                                                                                                                                                                                                       | 2           | 402.8516804 | 1.267326733 | 2267.716591 | 202  | 2275  |
| chemotherapi induct                 | induction chemotherapy                     | induction chemotherapy &chemotherapy induction &chemotherapy during induction                                                                                                                                                | 2           | 525.5955517 | 1.546286296 | 1474.529962 | 216  | 2730  |
| chemotherapi neoadjuv               | neoadjuvant chemotherapy                   | neoadjuvant chemotherapy &chemotherapy in the neoadjuvant                                                                                                                                                                    | 2           | 544.4792242 | 1.655502392 | 1088.554416 | 209  | 2525  |
| chemotherapi regimen                | chemotherapy regimens                      | chemotherapy regimens &chemotherapy regimen &regimen of chemotherapy &regimens of chemotherapy &regimen with chemotherapy                                                                                                    | 2           | 782.0687701 | 1.129545455 | 2377.81637  | 440  | 6489  |
| chest pain                          | chest pain                                 | chest pain &pain in the chest                                                                                                                                                                                                | 2           | 478.3863704 | 1.490196078 | 1163.510839 | 204  | 2252  |
| cholesterol ldl                     | LDL cholesterol                            | LDL cholesterol                                                                                                                                                                                                              | 2           | 506.7118792 | 1.916666667 | 1211.455039 | 182  | 2332  |
| cholesterol level                   | cholesterol levels                         | cholesterol levels &cholesterol level &levels of cholesterol                                                                                                                                                                 | 2           | 580.6729299 | 1.563559322 | 1948.087501 | 251  | 3577  |
| chromosom segreg                    | chromosome segregation                     | chromosome segregation                                                                                                                                                                                                       | 2           | 437.4717466 | 1.252252252 | 4497.72119  | 222  | 906   |
| chromosom x                         | X chromosome                               | X chromosome &X chromosomes &chromosome X &chromosomes X                                                                                                                                                                     | 2           | 640.4712262 | 1.674897119 | 1224.285674 | 243  | 954   |
| chronic failur heart                | chronic heart failure                      | chronic heart failure                                                                                                                                                                                                        | 3           | 534.1564763 | 1.120833333 | 6837.84787  | 340  | 3402  |
| circadian clock                     | circadian clock                            | circadian clock                                                                                                                                                                                                              | 2           | 420.1617135 | 1.296116505 | 1273.507379 | 206  | 958   |
| class ii                            | class II                                   | class II &class of II                                                                                                                                                                                                        | 2           | 451.634501  | 1.292792793 | 1375.522277 | 222  | 1909  |
| clin j oncol                        | J Clin Oncol                               | J Clin Oncol                                                                                                                                                                                                                 | 3           | 2942.824899 | 1           | 15619.54314 | 1482 | 20631 |
| cohort prospect studi               | prospective cohort study                   | prospective cohort study &Prospective cohort study &prospective cohort studies &study of a prospective cohort &prospective study in a cohort                                                                                 | 3           | 1247.027015 | 1.021138211 | 11007.09834 | 719  | 8685  |
| cohort retrospect studi             | retrospective cohort study                 | retrospective cohort study &Retrospective cohort study                                                                                                                                                                       | 3           | 955.1273796 | 1.006276151 | 7680.245704 | 478  | 5829  |
| cohort studi                        | cohort study                               | cohort study &cohort studies &study cohort &Cohort Study &Cohort study &Study Cohort &study of a cohort &study a cohort                                                                                                      | 2           | 2736.558976 | 1.955218447 | 15989.43591 | 3183 | 35442 |
| coli escherichia                    | Escherichia coli                           | Escherichia coli                                                                                                                                                                                                             | 2           | 1753.034265 | 1.007233273 | 5997.983391 | 1106 | 4537  |
| colony-stimul factor granulocyt     | granulocyte colony-stimulating factor      | granulocyte colony-stimulating factor &colony-stimulating factor and granulocyt                                                                                                                                              | 3           | 393.170938  | 1.010204082 | 1394.25088  | 196  | 2265  |
| complete remis                      | complete remission                         | complete remission                                                                                                                                                                                                           | 2           | 698.6958831 | 1.206521739 | 3889.401143 | 368  | 4713  |
| complet respons                     | complete response                          | complete response &complete responses                                                                                                                                                                                        | 2           | 1403.686324 | 1.145057766 | 12497.05429 | 789  | 11622 |
| complex protein                     | protein complexes                          | protein complexes                                                                                                                                                                                                            | 2           | 420.1617135 | 1.197309417 | 4675.134872 | 223  | 1030  |
| comput tomographi                   | computed tomography                        | computed tomography                                                                                                                                                                                                          | 2           | 708.1377194 | 1.061320755 | 1680.182246 | 481  | 4363  |
| conclud patient                     | Conclusion Patients                        | Conclusion Patients &Conclusion In patients &CONCLUSIONS In patients &Conclusion Among patients &CONCLUSIONS Among patients &Conclusions In patients &Conclusions Among patients &Conclusion For patients &Conclusions For p | 2           | 1419.422717 | 1           | 1628.870365 | 902  | 12619 |
| conclud relev                       | CONCLUSIONS AND RELEVANCE                  | CONCLUSIONS AND RELEVANCE                                                                                                                                                                                                    | 3           | 1302.973404 | 1           | 10114.83371 | 828  | 11905 |
| confid interv                       | confidence intervals                       | confidence intervals &confidence interval                                                                                                                                                                                    | 2           | 804.1297213 | 1.071278826 | 3313.937433 | 477  | 5819  |
| confid percent                      | percent confidence                         | percent confidence                                                                                                                                                                                                           | 2           | 1680.646854 | 1.561403509 | 16650.29352 | 684  | 7707  |
| congenit diseas heart               | congenital heart disease                   | congenital heart disease                                                                                                                                                                                                     | 3           | 460.6851394 | 1.171717172 | 7181.627859 | 198  | 1563  |
| congest failur heart                | congestive heart failure                   | congestive heart failure                                                                                                                                                                                                     | 3           | 941.2273969 | 1.281081081 | 5339.414876 | 370  | 4815  |
| consect patient                     | consecutive patients                       | consecutive patients                                                                                                                                                                                                         | 2           | 1166.066778 | 1.027739251 | 3112.709927 | 721  | 7942  |
| control group                       | control group                              | control group &control groups &group against control                                                                                                                                                                         | 2           | 4601.321537 | 2.118640958 | 2513.905218 | 1380 | 16234 |
| control randomis trial              | randomised controlled trials               | randomised controlled trials &Randomised controlled trials &controlled randomised trials                                                                                                                                     | 3           | 969.0273623 | 1.308310992 | 6978.438139 | 373  | 4009  |
| cooper eastern group oncolog        | Eastern Cooperative Oncology Group         | Eastern Cooperative Oncology Group                                                                                                                                                                                           | 4           | 891.5846017 | 1.004474273 | 14279.51565 | 447  | 8606  |
| cooper group oncolog perform        | Cooperative Oncology Group performance     | Cooperative Oncology Group performance                                                                                                                                                                                       | 4           | 587.7706951 | 1.003389831 | 10357.37269 | 295  | 6269  |
| copy number                         | copy number                                | copy number                                                                                                                                                                                                                  | 2           | 988.2455284 | 1.322105263 | 1483.519382 | 525  | 3729  |
| coronari diseas heart               | coronary heart disease                     | coronary heart disease                                                                                                                                                                                                       | 3           | 2233.925784 | 1.478318003 | 20911.18408 | 823  | 9784  |
| coronari intervent percutan         | percutaneous coronary intervention         | percutaneous coronary intervention                                                                                                                                                                                           | 3           | 1358.226877 | 1.11038961  | 35011.19204 | 794  | 9847  |
| coronari intervent percutan primari | primary percutaneous coronary intervention | primary percutaneous coronary intervention &coronary intervention vs. primary percutaneous intervention                                                                                                                      | 4           | 391.1852262 | 1.059139785 | 15467.74186 | 186  | 2545  |
| cox hazard model proport            | Cox proportional hazards models            | Cox proportional hazards models &Cox proportional hazards model                                                                                                                                                              | 4           | 712.870539  | 1.011267606 | 10401.41412 | 355  | 5842  |
| cox hazard proport                  | Cox proportional hazards                   | Cox proportional hazards &Cox proportional hazard                                                                                                                                                                            | 3           | 480.5422575 | 1.016806723 | 2203.242331 | 782  | 12133 |
| cox hazard proport regress          | Cox proportional hazards regression        | Cox proportional hazards regression &Cox regression proportional hazards                                                                                                                                                     | 4           | 405.0852088 | 1.02        | 7416.813098 | 200  | 3082  |
| cox multivari                       | multivariate Cox                           | multivariate Cox &multivariable Cox &Cox multivariate &Cox multivariable                                                                                                                                                     | 2           | 456.3554192 | 1.028368794 | 3056.632529 | 282  | 4386  |
| cox regress                         | Cox regression                             | Cox regression &regression Cox                                                                                                                                                                                               | 2           | 467.3708948 | 1.03125     | 5117.625372 | 635  | 9498  |
| c-reactiv protein                   | C-reactive protein                         | C-reactive protein                                                                                                                                                                                                           | 2           | 974.082774  | 1.628947368 | 1986.593462 | 410  | 5006  |
| criteria elig                       | eligibility criteria                       | eligibility criteria &Eligibility criteria                                                                                                                                                                                   | 2           | 420.1617135 | 1.145922747 | 1236.190636 | 233  | 3253  |
| criteria inclus                     | inclusion criteria                         | inclusion criteria &criteria for inclusion                                                                                                                                                                                   | 2           | 505.1382398 | 1.049019608 | 2178.275158 | 306  | 3738  |
| critic role                         | critical role                              | critical role &critical roles                                                                                                                                                                                                | 2           | 894.3853295 | 1.016274864 | 2431.372164 | 553  | 2588  |
| crucial role                        | crucial role                               | crucial role                                                                                                                                                                                                                 | 2           | 481.5336492 | 1.00990099  | 1390.197205 | 303  | 1406  |
| cryo-electron microscopi            | cryo-electron microscopy                   | cryo-electron microscopy                                                                                                                                                                                                     | 2           | 489.4018461 | 1.023026316 | 12795.63145 | 304  | 1082  |
| crystal report structur             | report the crystal structure               | report the crystal structure &report crystal structures &report the crystal structures &report a crystal structure &report on the crystal structure                                                                          | 4           | 603.6563896 | 1           | 64240.96875 | 304  | 1488  |
| crystal structur                    | crystal structure                          | crystal structure &crystal structures &Crystal structure &Crystal structures                                                                                                                                                 | 2           | 2264.467063 | 1.054212454 | 41960.44058 | 1720 | 7114  |
| damag dna                           | DNA damage                                 | DNA damage &damage DNA &damage the DNA &DNA from damage                                                                                                                                                                      | 2           | 1406.833602 | 1.425837321 | 6696.798871 | 739  | 4306  |
| data set                            | data sets                                  | data sets &sets of data                                                                                                                                                                                                      | 2           | 837.1761482 | 1.156521739 | 1309.766103 | 460  | 2575  |
| data sourc                          | Data sources                               | Data sources &Data Sources &data sources &DATA SOURCES &sources Data                                                                                                                                                         | 2           | 782.0987701 | 1.026859504 | 5458.809802 | 562  | 6146  |
| death hazard ratio                  | hazard ratio for death                     | hazard ratio for death &hazard ratio of death &death hazard ratio                                                                                                                                                            | 4           | 403.099497  | 1.153409091 | 1989.750271 | 176  | 2618  |
| death rate                          | death rates                                | death rates &death rate &rate of death &rates of death                                                                                                                                                                       | 2           | 1104.694842 | 1.5         | 2050.083997 | 468  | 5784  |
| death risk                          | risk of death                              | risk of death &death risk &risk for death &death and risk &risk until death                                                                                                                                                  | 3           | 843.4707057 | 1.240740741 | 1391.395471 | 437  | 6204  |
| depart emerg                        | emergency department                       | emergency department &emergency departments &department emergency                                                                                                                                                            | 2           | 889.1062477 | 1.482939633 | 1922.881868 | 408  | 4058  |
| diabetes mellitu                    | diabetes mellitus                          | diabetes mellitus                                                                                                                                                                                                            | 1332.872552 | 1.206552707 | 1214.396113 | 7414        | 702  | 4118  |
| differ risk                         | risk difference                            | risk difference &difference in risk &difference in the risk                                                                                                                                                                  | 2           | 423.3088922 | 1.393782383 | 1608.097714 | 259  | 3546  |
| differ signific                     | significant differences                    | significant differences &significant difference                                                                                                                                                                              | 2           | 3668.153386 | 1.134858812 | 3421.212622 | 2121 | 26824 |
| discharg hospit                     | hospital discharge                         | hospital discharge                                                                                                                                                                                                           | 2           | 530.3164698 | 1.484581498 | 1319.997842 | 227  | 2968  |
| diseas graft-versus-host            | graft-versus-host disease                  | graft-versus-host disease                                                                                                                                                                                                    | 2           | 426.456271  | 1.138655462 | 3809.460551 | 238  | 2467  |
| diseas heart                        | heart disease                              | heart disease                                                                                                                                                                                                                | 2           | 1110.9894   | 1.329566855 | 22019.63439 | 1861 | 20013 |
| diseas heart ischaem                | ischaemic heart disease                    | ischaemic heart disease                                                                                                                                                                                                      | 3           | 732.7276571 | 1.470119522 | 6608.736076 | 251  | 2928  |
| diseas human                        | human disease                              | human disease &human diseases                                                                                                                                                                                                | 2           | 629.4557506 | 1.049868766 | 1744.713547 | 381  | 1860  |
| diseas metastat                     | metastatic disease                         | metastatic disease &disease as metastatic                                                                                                                                                                                    | 2           | 797.8351638 | 1.201421801 | 1443.734583 | 422  | 5496  |

|                                  |                                            |                                                                                                                                                                                                                                               |   |              |             |             |      |       |
|----------------------------------|--------------------------------------------|-----------------------------------------------------------------------------------------------------------------------------------------------------------------------------------------------------------------------------------------------|---|--------------|-------------|-------------|------|-------|
| disease neurodegen               | neurodegenerative diseases                 | neurodegenerative diseases& neurodegenerative disease                                                                                                                                                                                         | 2 | 476.812731   | 1.165384615 | 1207.358435 | 260  | 1280  |
| disease progress                 | disease progression                        | disease progression& progressive disease& progression of disease& progression of the disease& disease progressive& progression disease                                                                                                        | 2 | 3054.434003  | 1.258754864 | 6576.354224 | 1585 | 22635 |
| disease risk                     | disease risk                               | disease risk& risk of disease& risk disease& risk of the disease& risk for the disease& risk for disease& disease and risk& disease with risk& risk of this disease                                                                           | 2 | 456.3554192  | 1.169354839 | 1663.229117 | 291  | 3065  |
| disease stabl                    | stable disease                             | stable disease                                                                                                                                                                                                                                | 2 | 960.3773315  | 1.1125      | 11554.94925 | 560  | 8947  |
| dna methyl                       | DNA methylation                            | DNA methylation& methylation of DNA& DNA from methylation                                                                                                                                                                                     | 2 | 1391.655372  | 1.650375694 | 26361.99325 | 5302 | 28000 |
| dna polymeras                    | DNA polymerase                             | DNA polymerase& DNA polymerases                                                                                                                                                                                                               | 2 | 407.5725985  | 1.282178218 | 2342.094202 | 202  | 909   |
| dna repair                       | DNA repair                                 | DNA repair& repair DNA& repair of DNA& DNA during repair& repair the DNA                                                                                                                                                                      | 2 | 953.6254621  | 1.267782427 | 10687.31682 | 478  | 2865  |
| dna replic                       | DNA replication                            | DNA replication& replication of DNA& replication before DNA& DNA during replication                                                                                                                                                           | 2 | 944.1836258  | 1.34529148  | 8379.313253 | 446  | 2353  |
| dna sequenc                      | DNA sequence                               | DNA sequence& DNA sequences& sequence DNA& sequence the DNA                                                                                                                                                                                   | 2 | 841.8970664  | 1.126315789 | 294.1560748 | 475  | 2056  |
| dose escal                       | dose escalation                            | dose escalation& escalating doses& escalation of the dose                                                                                                                                                                                     | 2 | 426.456271   | 1.110655738 | 1908.471859 | 244  | 2941  |
| dose level                       | dose levels                                | dose levels& dose level                                                                                                                                                                                                                       | 2 | 714.4322769  | 1.455128205 | 3349.080248 | 312  | 3988  |
| dose maximum-toler               | maximum-tolerated dose                     | maximum-tolerated dose                                                                                                                                                                                                                        | 2 | 516.1537155  | 1.071895425 | 5066.444229 | 306  | 3798  |
| dose-limit toxic                 | dose-limiting toxicity                     | dose-limiting toxicity& dose-limiting toxicities                                                                                                                                                                                              | 2 | 546.0528636  | 1.101587302 | 4188.294911 | 315  | 4120  |
| dot quantum                      | quantum dots                               | quantum dots& quantum dot                                                                                                                                                                                                                     | 2 | 1024.439234  | 1.557416268 | 4504.272039 | 418  | 1457  |
| drosophila melanogast            | Drosophila melanogaster                    | Drosophila melanogaster                                                                                                                                                                                                                       | 2 | 805.7033607  | 1.001956947 | 4460.66666  | 511  | 1949  |
| drug resist                      | drug resistance                            | drug resistance                                                                                                                                                                                                                               | 2 | 643.6185049  | 1.31511254  | 1100.726432 | 311  | 2213  |
| drug studi                       | study drug                                 | study drug& drug under study& study of a drug                                                                                                                                                                                                 | 2 | 550.7737817  | 1.151315789 | 3920.851473 | 430  | 6842  |
| drug-elut stent                  | drug-eluting stents                        | drug-eluting stents& drug-eluting stent                                                                                                                                                                                                       | 2 | 481.5336492  | 1.291139241 | 2834.680091 | 237  | 2527  |
| dural median                     | median duration                            | median duration& Median duration                                                                                                                                                                                                              | 2 | 525.5955517  | 1.077419355 | 3082.291837 | 468  | 7109  |
| efficacy safeti                  | efficacy and safety                        | efficacy and safety& safety and efficacy& Efficacy and safety& Safety and efficacy& efficacy or safety& safety or efficacy& efficacy and Safety                                                                                               | 3 | 2643.714152  | 1.031941032 | 4606.139288 | 1628 | 21107 |
| egfr mutat                       | EGFR mutations                             | EGFR mutations& EGFR mutation& mutations in EGFR& mutation in EGFR& mutations in the EGFR                                                                                                                                                     | 2 | 446.9135829  | 2.308943089 | 4458.745651 | 123  | 2000  |
| eject fraction                   | ejection fraction                          | ejection fraction                                                                                                                                                                                                                             | 2 | 736.4632281  | 1.251336898 | 5272.724249 | 915  | 11681 |
| eject fraction ventricular       | ventricular ejection fraction              | ventricular ejection fraction                                                                                                                                                                                                                 | 2 | 951.155956   | 1.148681055 | 15146.70824 | 417  | 6196  |
| electr field                     | electric field                             | electric field& electric fields                                                                                                                                                                                                               | 2 | 445.3399435  | 1.246696035 | 4939.441423 | 227  | 631   |
| electron microscopi              | electron microscopy                        | electron microscopy                                                                                                                                                                                                                           | 2 | 667.2230956  | 1.087179487 | 3259.144004 | 536  | 1747  |
| elev infarct myocardi st-segment | ST-segment elevation myocardial infarction | ST-segment elevation myocardial infarction& myocardial infarction with ST-segment elevation& myocardial infarction without ST-segment elevation                                                                                               | 4 | 470.6136985  | 1.156097561 | 6155.416725 | 205  | 2981  |
| elig patient                     | eligible patients                          | eligible patients& Eligible patients                                                                                                                                                                                                          | 2 | 1468.205538  | 1.082366589 | 3143.326291 | 971  | 15058 |
| emiss positron tomographi        | positron emission tomography               | positron emission tomography                                                                                                                                                                                                                  | 3 | 788.3275877  | 1.061497326 | 1123.175664 | 374  | 3332  |
| encod gene                       | gene encoding                              | gene encoding& genes encoding& gene encodes& gene that encodes& encoding genes& encoding gene& encodes a gene                                                                                                                                 | 2 | 1194.392287  | 1.042582418 | 1836.946471 | 728  | 3963  |
| end point                        | end point                                  | end point& end points                                                                                                                                                                                                                         | 2 | 1965.475681  | 1.286302781 | 24489.90258 | 3028 | 44632 |
| end point primari                | primary end point                          | primary end point& primary end points& Primary end point& Primary end points                                                                                                                                                                  | 3 | 4801.451152  | 1.142722117 | 24087.76662 | 2118 | 32233 |
| end point secundari              | Secondary end points                       | Secondary end points& secondary end points& secondary end point                                                                                                                                                                               | 3 | 1759.340962  | 1.041128985 | 12328.76777 | 851  | 14079 |
| endoplasm reticulum              | endoplasmic reticulum                      | endoplasmic reticulum                                                                                                                                                                                                                         | 2 | 810.4242768  | 1.122044357 | 7046.322659 | 459  | 1923  |
| endothel factor growth vascular  | vascular endothelial growth factor         | vascular endothelial growth factor& factor vascular endothelial growth                                                                                                                                                                        | 4 | 496.427952   | 1.012145749 | 5259.994385 | 247  | 2712  |
| endpoint primari                 | primary endpoints                          | primary endpoint& Primary endpoints& Primary endpoints                                                                                                                                                                                        | 2 | 3375.456462  | 1.175342466 | 8351.17846  | 1825 | 24703 |
| endpoint secundari               | Secondary endpoints                        | Secondary endpoints& secondary endpoints& secondary endpoint                                                                                                                                                                                  | 2 | 508.2855186  | 1.059016393 | 3501.84548  | 305  | 4120  |
| eng j med n                      | N Engl J Med                               | N Engl J Med                                                                                                                                                                                                                                  | 4 | 1681.897901  | 1           | 51174.23981 | 847  | 8491  |
| enrol patient                    | enrolled patients                          | enrolled patients& patients enrolled                                                                                                                                                                                                          | 2 | 618.4402749  | 1.03968254  | 1896.688621 | 378  | 5582  |
| epiderm factor growth receptor   | epidermal growth factor receptor           | epidermal growth factor receptor                                                                                                                                                                                                              | 4 | 691.0277091  | 1.008695652 | 17456.18825 | 345  | 4672  |
| essent role                      | essential role                             | essential role& essential roles                                                                                                                                                                                                               | 2 | 583.8202086  | 1.019230769 | 2712.37018  | 364  | 1785  |
| estrogen receptor                | estrogen receptor                          | estrogen receptor                                                                                                                                                                                                                             | 2 | 572.804733   | 1.089820359 | 2891.450957 | 334  | 4242  |
| event rate                       | event rates                                | event rates& event rate                                                                                                                                                                                                                       | 2 | 613.7193568  | 1.368421053 | 1118.303491 | 285  | 4010  |
| express gene                     | gene expression                            | gene expression& Gene expression& expressed genes& Gene Expression& expression of genes& expression of these genes& expression of the gene& expression of the genes& expression of this gene& genes for expression& genes expres              | 2 | 6172.378755  | 1.265927978 | 17422.73268 | 3471 | 19829 |
| express level                    | expression levels                          | expression levels& expression level& level of expression& levels of expression& level expression                                                                                                                                              | 2 | 758.4941794  | 1.265091864 | 3011.487359 | 381  | 3243  |
| express pattern                  | expression patterns                        | expression patterns& expression pattern& pattern of expression& patterns of expression                                                                                                                                                        | 2 | 483.1072985  | 1.108303249 | 5084.327905 | 346  | 2123  |
| express protein                  | protein expression                         | protein expression& expression of this protein                                                                                                                                                                                                | 2 | 766.3623763  | 1.22979798  | 2021.461114 | 396  | 3111  |
| growth factor                    | growth factor                              | growth factor& growth factors& Growth Factor                                                                                                                                                                                                  | 2 | 1661.763181  | 1.121019108 | 23796.98525 | 2522 | 25768 |
| factor growth receptor           | growth factor receptor                     | growth factor receptor& Growth Factor Receptor                                                                                                                                                                                                | 3 | 1685.869325  | 1.027845036 | 23517.40399 | 1158 | 15185 |
| factor prognost                  | prognostic factors                         | prognostic factors& prognostic factor& Prognostic factors& factors prognostic& factor prognostic                                                                                                                                              | 2 | 1926.134597  | 1.280334728 | 5130.96482  | 1081 | 13997 |
| factor risk                      | risk factors                               | risk factors& risk factor& Risk factors& Risk Factors& risk by a factor& factors on the risk& risk and factors& factors with the risk                                                                                                         | 2 | 7668.344681  | 1.467771084 | 6510.038164 | 3662 | 39564 |
| factor transcript                | transcription factor                       | transcription factor& transcription factors& factor transcription& transcription by factors                                                                                                                                                   | 2 | 4950.669478  | 1.213734568 | 20914.82995 | 2634 | 13572 |
| failur heart                     | heart failure                              | heart failure& Heart Failure& Heart failure& heart from failure                                                                                                                                                                               | 2 | 581.846667   | 1.52        | 6282.41706  | 3104 | 31551 |
| failur heart patient             | patients with heart failure                | patients with heart failure& heart failure patients& heart failure in patients& patients without heart failure& heart failure in these patients& heart failure among patients& heart failure for patients& heart failure for patients in thos | 4 | 818.1132649  | 1.263803681 | 6806.565895 | 341  | 4189  |
| treatment failure                | treatment failure                          | treatment failure& failure of treatment& failure treatment& failure in treatment& failure during treatment                                                                                                                                    | 2 | 955.1991015  | 1.421545667 | 1183.64151  | 427  | 5448  |
| febril neutropenia               | febrile neutropenia                        | febrile neutropenia                                                                                                                                                                                                                           | 2 | 564.9365361  | 1.184818482 | 2159.204642 | 303  | 4753  |
| feedback loop                    | feedback loop                              | feedback loop& feedback loops                                                                                                                                                                                                                 | 2 | 468.9445342  | 1.226337449 | 1979.465535 | 243  | 1085  |
| field magnet                     | magnetic field                             | magnetic field& magnetic fields                                                                                                                                                                                                               | 2 | 1164.493139  | 1.293706294 | 1631.61232  | 572  | 1272  |
| first-lin therapi                | first-line therapy                         | first-line therapy                                                                                                                                                                                                                            | 2 | 409.1462379  | 1.140350877 | 1222.688431 | 228  | 3267  |
| first-lin treatment              | first-line treatment                       | first-line treatment                                                                                                                                                                                                                          | 2 | 623.161193   | 1.125       | 2065.097743 | 417  | 5882  |
| follow-up median                 | median follow-up                           | median follow-up& Median follow-up                                                                                                                                                                                                            | 2 | 3284.185379  | 1.048743719 | 3549.633124 | 2195 | 31619 |
| follow-up median result          | Results Median follow-up                   | Results Median follow-up& Results After a median follow-up& Results With a median follow-up& Results During a median follow-up& Results The median follow-up& Results Over a median follow-up& Results A                                      | 3 | 454.728004   | 1           | 2864.477691 | 229  | 3484  |
| function ventricular             | ventricular function                       | ventricular function                                                                                                                                                                                                                          | 2 | 415.4407954  | 1.178571429 | 1792.992657 | 224  | 2512  |
| fusion protein                   | fusion protein                             | fusion protein& fusion proteins& protein fusion                                                                                                                                                                                               | 2 | 478.3863704  | 1.151515152 | 1255.429876 | 264  | 1564  |
| g mu                             | mu g                                       | mu g                                                                                                                                                                                                                                          | 2 | 660.9285381  | 1.52173913  | 1083.665239 | 276  | 2850  |
| g protein                        | G protein                                  | G protein& G proteins& protein G& proteins G                                                                                                                                                                                                  | 2 | 616.8666355  | 1.410071942 | 2315.353109 | 278  | 1129  |
| gain weight                      | weight gain                                | weight gain& gain weight& gain in weight                                                                                                                                                                                                      | 2 | 549.2001424  | 1.608294931 | 1278.129123 | 217  | 2123  |
| gene mutat                       | gene mutations                             | gene mutations& gene mutation& mutated genes& mutations in the gene& mutations in genes& mutations in the genes& mutation in the gene& mutations in these genes& mutations in a gene& mutations in this gene& mutation of the gene&           | 2 | 925.2999533  | 1.164356436 | 3148.663164 | 505  | 3646  |
| gene product                     | gene products                              | gene products& gene product& product of the gene& product of this gene& product of a gene                                                                                                                                                     | 2 | 420.1617135  | 1.076612903 | 1469.73399  | 248  | 1181  |
| gene regul                       | gene regulation                            | gene regulation& regulation of gene& regulation gene& regulation of the gene& gene in the regulation                                                                                                                                          | 2 | 626.3084718  | 1.081521739 | 6567.413977 | 368  | 1733  |
| gene target                      | target genes                               | target genes& target gene& gene target& genes target                                                                                                                                                                                          | 2 | 1122.004875  | 1.170771757 | 8637.791229 | 609  | 3398  |
| gener popul                      | general population                         | general population                                                                                                                                                                                                                            | 2 | 1450.895505  | 1.340116279 | 1376.256574 | 688  | 7376  |
| gener practic                    | general practices                          | general practices& general practice                                                                                                                                                                                                           | 2 | 492.5491248  | 1.257028112 | 1299.707951 | 249  | 2770  |
| genet variant                    | genetic variants                           | genetic variants                                                                                                                                                                                                                              | 2 | 473.6654523  | 1.148654962 | 2869.817836 | 262  | 2059  |
| genetic variat                   | genetic variation                          | genetic variation& Genetic variation                                                                                                                                                                                                          | 2 | 755.54689007 | 1.153846154 | 1542.025744 | 416  | 2361  |
| genome human                     | human genome                               | human genome                                                                                                                                                                                                                                  | 2 | 786.8196882  | 1.157407407 | 1854.239533 | 432  | 1851  |
| ground state                     | ground state                               | ground state                                                                                                                                                                                                                                  | 2 | 412.2935166  | 1.207373272 | 2183.848029 | 217  | 639   |
| group intervent                  | intervention group                         | intervention group& intervention groups& group intervention& groups after intervention                                                                                                                                                        | 2 | 1696.383248  | 2.191056911 | 8518.82803  | 492  | 5691  |
| group oncolog                    | Oncology Group                             | Oncology Group& oncology group& group in oncology                                                                                                                                                                                             | 2 | 695.5486044  | 1.023148148 | 6369.303915 | 1159 | 15787 |
| group oncolog perform statu      | Oncology Group performance status          | Oncology Group performance status                                                                                                                                                                                                             | 4 | 575.8564243  | 1.003460208 | 10391.98993 | 289  | 6183  |
| group placebo                    | placebo group                              | placebo group& placebo groups& groups versus placebo                                                                                                                                                                                          | 2 | 5181.994466  | 2.015299878 | 6307.434894 | 1664 | 22594 |
| group studi                      | study groups                               | study groups& study group& Study Group& Group Study& group study& groups in this study& groups during the study& group of the study                                                                                                           | 2 | 1241.601468  | 1.082304527 | 1327.619507 | 903  | 9038  |
| group treatment                  | treatment groups                           | treatment groups& treatment group& Treatment Group& treatment in each group& groups of treatment& treatment in this group& treatment for this group& groups after treatment& treatment in all groups& treatment in both groups& treatment     | 2 | 2354.164507  | 1.290767903 | 3173.922569 | 1227 | 16431 |

|                            |                                 |                                                                                                                                                                                                                                                                    |   |             |             |             |      |       |
|----------------------------|---------------------------------|--------------------------------------------------------------------------------------------------------------------------------------------------------------------------------------------------------------------------------------------------------------------|---|-------------|-------------|-------------|------|-------|
| group vs                   | group vs                        | group vs( vs group & group I vs                                                                                                                                                                                                                                    | 2 | 1055.912022 | 1.266037736 | 3857.664302 | 530  | 8931  |
| growth rate                | growth rate                     | growth rate( & growth rates & rate of growth & rates of growth                                                                                                                                                                                                     | 2 | 486.2545673 | 1.282157676 | 1568.940581 | 241  | 968   |
| growth tumor               | tumor growth                    | tumor growth( & growth of a tumor & growth of tumor                                                                                                                                                                                                                | 2 | 621.5875537 | 1.196969697 | 3196.987456 | 330  | 2587  |
| H3 histon                  | histone H3                      | histone H3( & H3 histone                                                                                                                                                                                                                                           | 2 | 640.4712262 | 1.222222222 | 6634.116257 | 454  | 2380  |
| hazard ratio               | hazard ratio                    | hazard ratio( & hazard ratios & Hazard ratios                                                                                                                                                                                                                      | 2 | 8576.334601 | 1.195699686 | 6777.159502 | 5127 | 75015 |
| head neck                  | head and neck                   | head and neck( & head or neck                                                                                                                                                                                                                                      | 3 | 440.6190254 | 1.233480176 | 3892.454476 | 227  | 2814  |
| health servic              | health services                 | health services( & Health Service & health service & Service Health                                                                                                                                                                                                | 2 | 703.4168012 | 1.214673913 | 1570.399524 | 439  | 3598  |
| health studi               | Health Study                    | Health Study( & Study of Health & Study Health                                                                                                                                                                                                                     | 2 | 402.8516804 | 1.066666667 | 3027.092266 | 240  | 3127  |
| health system              | health systems                  | health systems( & health system                                                                                                                                                                                                                                    | 2 | 695.5486044 | 1.351681957 | 1958.962438 | 327  | 2232  |
| heart rate                 | heart rate                      | heart rate                                                                                                                                                                                                                                                         | 2 | 996.1137252 | 1.555282555 | 2431.831496 | 458  | 4454  |
| helper t                   | T helper                        | T helper( & helper T                                                                                                                                                                                                                                               | 2 | 391.8362047 | 1.050584746 | 8468.723757 | 236  | 1409  |
| hemispher northern         | Northern Hemisphere             | Northern Hemisphere                                                                                                                                                                                                                                                | 2 | 410.7198772 | 1.266990291 | 7384.345935 | 206  | 861   |
| hg mm                      | mm Hg                           | mm Hg                                                                                                                                                                                                                                                              | 2 | 1136.16763  | 1.675174014 | 7370.479083 | 431  | 5799  |
| higher risk                | higher risk                     | higher risk                                                                                                                                                                                                                                                        | 2 | 1186.52409  | 1.15467075  | 1625.583836 | 653  | 8632  |
| histocompat major          | major histocompatibility        | major histocompatibility                                                                                                                                                                                                                                           | 2 | 421.7353529 | 1.015151515 | 4965.55189  | 264  | 1554  |
| histon modif               | histone modifications           | histone modifications( & histone modification                                                                                                                                                                                                                      | 2 | 420.1617135 | 1.247663551 | 4171.324634 | 214  | 1267  |
| hiv infect                 | HIV infection                   | HIV infection( & infection with HIV                                                                                                                                                                                                                                | 2 | 963.0672983 | 1.507389163 | 4257.05299  | 406  | 3322  |
| hiv-1 infect               | HIV-1 infection                 | HIV-1 infection( & infection with HIV-1 & infection by HIV-1                                                                                                                                                                                                       | 2 | 613.7193598 | 1.418181818 | 2351.192592 | 275  | 1899  |
| human immunodefici viru    | human immunodeficiency virus    | human immunodeficiency virus                                                                                                                                                                                                                                       | 3 | 627.4849313 | 1.003174803 | 31708.46525 | 315  | 3273  |
| ice sheet                  | ice sheet                       | ice sheet( & ice sheets & Ice Sheet                                                                                                                                                                                                                                | 2 | 723.8741131 | 1.660649819 | 3710.504034 | 316  | 1283  |
| ii phase                   | phase II                        | phase II( & Phase II                                                                                                                                                                                                                                               | 2 | 1798.669807 | 1.089609152 | 23841.18902 | 2073 | 23390 |
| ii phase studi             | phase II study                  | phase II study( & Phase II Study & Phase II study & phase II studies & study phase II & Study Phase II                                                                                                                                                             | 3 | 1693.812172 | 1.05308642  | 18618.82464 | 810  | 9778  |
| ii pol                     | Pol II                          | Pol II                                                                                                                                                                                                                                                             | 2 | 423.3089922 | 2.223140496 | 20056.95909 | 121  | 754   |
| ii polymeras ma            | RNA polymerase II               | RNA polymerase II                                                                                                                                                                                                                                                  | 3 | 687.0562855 | 1.098412698 | 89507.57825 | 315  | 1854  |
| ii stage                   | stage II                        | stage II( & II stage                                                                                                                                                                                                                                               | 2 | 709.7113587 | 1.523648649 | 1207.505027 | 296  | 3917  |
| iii phase                  | phase III                       | phase III( & Phase III                                                                                                                                                                                                                                             | 2 | 1875.778137 | 1.065236819 | 5229.383246 | 1704 | 19390 |
| iii phase random           | randomized phase III            | randomized phase III( & Randomized Phase III & phase III randomized & Phase III Randomized                                                                                                                                                                         | 3 | 416.9994797 | 1.019417476 | 5528.068322 | 206  | 2437  |
| iii phase studi            | phase III study                 | phase III study( & Phase III Study                                                                                                                                                                                                                                 | 3 | 647.3420494 | 1.03164557  | 8170.424609 | 316  | 4073  |
| iii stage                  | stage III                       | stage III                                                                                                                                                                                                                                                          | 2 | 859.2070995 | 1.309352518 | 1901.542131 | 522  | 7086  |
| iii patient                | III patients                    | III patients                                                                                                                                                                                                                                                       | 2 | 434.3244679 | 1.373134328 | 2486.578587 | 201  | 2031  |
| immun innat                | innate immunity                 | innate immunity                                                                                                                                                                                                                                                    | 2 | 413.867156  | 1.095833333 | 1218.64311  | 241  | 1414  |
| immun respons              | immune responses                | immune responses( & immune response                                                                                                                                                                                                                                | 2 | 1528.003834 | 1.165686267 | 8234.773081 | 906  | 5763  |
| immun system               | immune system                   | immune system                                                                                                                                                                                                                                                      | 2 | 774.2305732 | 1.138898889 | 4600.93529  | 432  | 2516  |
| import role                | important role                  | important role( & important roles                                                                                                                                                                                                                                  | 2 | 1400.539045 | 1.009070295 | 1722.200683 | 882  | 4813  |
| incid rate                 | incidence rate                  | incidence rate( & incidence rates & rates of incidence & incidence and rates                                                                                                                                                                                       | 2 | 986.671889  | 1.38410596  | 5637.64826  | 579  | 7529  |
| increas risk               | increased risk                  | increased risk( & increase the risk & increased risks & increase risk & increases the risk & increase in risk & increases risk & risk increase & increase in the risk & risk increases & increases in risk & increases in the risk & increases this risk & increas | 2 | 5213.467254 | 1.340210356 | 5630.079825 | 2654 | 31996 |
| independ predictor         | independent predictor           | independent predictor( & independent predictors                                                                                                                                                                                                                    | 2 | 1087.384809 | 1.153589316 | 3350.780141 | 599  | 7657  |
| induct therapi             | induction therapy               | induction therapy( & therapy induction                                                                                                                                                                                                                             | 2 | 428.0299104 | 1.353233831 | 2012.257531 | 201  | 2586  |
| infarct myocardi           | myocardial infarction           | myocardial infarction( & Myocardial Infarction                                                                                                                                                                                                                     | 2 | 4832.646525 | 1.349890111 | 8721.981774 | 2749 | 30881 |
| infarct myocardi non-fat   | non-fatal myocardial infarction | non-fatal myocardial infarction                                                                                                                                                                                                                                    | 3 | 415.0137679 | 1.244047619 | 1822.105107 | 168  | 2344  |
| infect viru                | virus infection                 | virus infection( & infection by this virus & infection with this virus                                                                                                                                                                                             | 2 | 621.5875537 | 1.278317152 | 1131.911503 | 309  | 2372  |
| inform quantum             | quantum information             | quantum information( & quantum of information                                                                                                                                                                                                                      | 2 | 657.7812593 | 1.197707736 | 3366.529279 | 349  | 853   |
| inhibitor kinas            | kinase inhibitor                | kinase inhibitor( & kinase inhibitors & inhibitor of the kinase                                                                                                                                                                                                    | 2 | 465.7972554 | 1.203252033 | 12568.75484 | 539  | 6959  |
| inhibitor kinas tyrosin    | tyrosine kinase inhibitor       | tyrosine kinase inhibitor( & tyrosine kinase inhibitors                                                                                                                                                                                                            | 3 | 643.3706258 | 1.08361204  | 30042.76167 | 299  | 4739  |
| in-hospit mortal           | in-hospital mortality           | in-hospital mortality( & in-hospital mortality                                                                                                                                                                                                                     | 2 | 613.7193598 | 1.652542373 | 1859.854477 | 236  | 2986  |
| insight new                | new insights                    | new insights( & new insight                                                                                                                                                                                                                                        | 2 | 572.804733  | 1.005524862 | 2233.370216 | 362  | 1953  |
| insulin resist             | insulin resistance              | insulin resistance                                                                                                                                                                                                                                                 | 2 | 1018.144677 | 1.58190709  | 1190.753744 | 409  | 3054  |
| intention-to-treat popul   | intention-to-treat population   | intention-to-treat population                                                                                                                                                                                                                                      | 2 | 700.2695225 | 1.138107417 | 5574.789654 | 486  | 8000  |
| interact protein-protein   | protein-protein interactions    | protein-protein interactions( & protein-protein interaction                                                                                                                                                                                                        | 2 | 484.6809279 | 1.12        | 2109.932436 | 275  | 1281  |
| interfer rna               | RNA interference                | RNA interference( & interference RNA                                                                                                                                                                                                                               | 2 | 939.4627077 | 1.043706294 | 7780.567764 | 572  | 2785  |
| interquartil rang          | interquartile range             | interquartile range                                                                                                                                                                                                                                                | 2 | 915.8581171 | 1.063985375 | 3171.826694 | 547  | 7744  |
| intervent patient          | Interventions Patients          | Interventions Patients( & INTERVENTIONS Patients & Intervention Patients                                                                                                                                                                                           | 2 | 517.7273548 | 1           | 5543.404679 | 329  | 5206  |
| iv stage                   | stage IV                        | stage IV                                                                                                                                                                                                                                                           | 2 | 508.2855186 | 1.281746032 | 1640.918304 | 300  | 4326  |
| key role                   | key role                        | key role( & key roles                                                                                                                                                                                                                                              | 2 | 859.2070995 | 1.009242144 | 1894.24059  | 541  | 2566  |
| kinas protein              | protein kinase                  | protein kinase( & protein kinases & kinase protein                                                                                                                                                                                                                 | 2 | 1403.686324 | 1.105328377 | 5992.572687 | 1017 | 5890  |
| kinas receptor tyrosin     | receptor tyrosine kinase        | receptor tyrosine kinase( & receptor tyrosine kinases & tyrosine kinase receptor                                                                                                                                                                                   | 3 | 589.7564069 | 1.060714286 | 22737.52415 | 280  | 2563  |
| kinas tyrosin              | tyrosine kinase                 | tyrosine kinase( & tyrosine kinases                                                                                                                                                                                                                                | 2 | 613.7193598 | 1.147058824 | 13635.54639 | 828  | 8771  |
| kingdom unit               | United Kingdom                  | United Kingdom                                                                                                                                                                                                                                                     | 2 | 690.8276862 | 1.131443299 | 1416.919977 | 388  | 4215  |
| lack mice                  | mice lacking                    | mice lacking( & Mice lacking                                                                                                                                                                                                                                       | 2 | 434.3244679 | 1.045454545 | 1479.98749  | 264  | 1323  |
| length scale               | length scales                   | length scales( & length scale & scale length                                                                                                                                                                                                                       | 2 | 404.4253197 | 1.13215859  | 4295.315005 | 227  | 526   |
| level protein              | protein levels                  | protein levels( & protein level & level of the protein & levels of protein & level of protein                                                                                                                                                                      | 2 | 479.9600098 | 1.159695917 | 1147.846367 | 313  | 2666  |
| level sea                  | sea level                       | sea level                                                                                                                                                                                                                                                          | 2 | 393.4098441 | 1.453488372 | 3249.153737 | 172  | 588   |
| life qualiti               | quality of life                 | quality of life( & Quality of life & life quality & life and quality                                                                                                                                                                                               | 3 | 2492.644772 | 1.290953545 | 1647.271772 | 1227 | 13506 |
| ligas ubiquitin            | ubiquitin ligase                | ubiquitin ligase( & ubiquitin ligases                                                                                                                                                                                                                              | 2 | 522.448273  | 1.133105802 | 3272.028136 | 439  | 2319  |
| logist regress             | logistic regression             | logistic regression( & Logistic regression                                                                                                                                                                                                                         | 2 | 582.2465693 | 1.010928962 | 1548.497088 | 433  | 5013  |
| loss weight                | weight loss                     | weight loss( & loss of both weight & loss of weight                                                                                                                                                                                                                | 2 | 1148.756745 | 1.784841076 | 2320.92121  | 409  | 4313  |
| lower rate                 | lower rates                     | lower rates( & lower rate                                                                                                                                                                                                                                          | 2 | 689.2540469 | 1.140625    | 1299.515648 | 384  | 4852  |
| lower risk                 | lower risk                      | lower risk                                                                                                                                                                                                                                                         | 2 | 959.9200196 | 1.252566735 | 1971.421675 | 487  | 6746  |
| lymph node                 | lymph nodes                     | lymph nodes( & lymph node                                                                                                                                                                                                                                          | 2 | 1686.941411 | 1.436997319 | 2966.189    | 1019 | 11175 |
| lymphocyt t                | T lymphocytes                   | T lymphocytes( & T lymphocyte                                                                                                                                                                                                                                      | 2 | 572.804733  | 1.166666667 | 6587.151454 | 370  | 2355  |
| magnitud order             | orders of magnitude             | orders of magnitude( & order of magnitude & orders magnitude & orders in magnitude & order and magnitude                                                                                                                                                           | 3 | 1013.423758 | 1.022222222 | 2669.11333  | 630  | 1604  |
| main measur outcom         | Main Outcome Measures           | Main Outcome Measures( & Main outcome measures & MAIN Outcome Measure & MAIN OUTCOMES AND MEASURES & Main outcome measure & MAIN OUTCOME MEASURES & MAIN OUTCOME AND MEASURES & MAIN OUTCOMES ME                                                                   | 3 | 9451.988206 | 1           | 57553.74052 | 4760 | 59133 |
| main outcom                | Main Outcome                    | Main Outcome( & Main outcome & MAIN OUTCOMES                                                                                                                                                                                                                       | 2 | 487.8282067 | 1           | 57480.94422 | 4928 | 61220 |
| mass spectrometri          | mass spectrometry               | mass spectrometry                                                                                                                                                                                                                                                  | 2 | 922.552746  | 1.087198516 | 2012.34967  | 596  | 2619  |
| massachusett medic societi | Massachusetts Medical Society   | Massachusetts Medical Society                                                                                                                                                                                                                                      | 3 | 1348.298318 | 1.00147926  | 52783.45096 | 678  | 6752  |
| measur outcom              | Outcome Measures                | Outcome Measures( & outcome measures & Outcome Measure & outcome measure & OUTCOME MEASURES & OUTCOME MEASURE & measures of outcome & measure of outcome                                                                                                           | 2 | 1077.942973 | 1.078740157 | 48696.18183 | 4913 | 57888 |
| measur outcom primari      | primary outcome measure         | primary outcome measure( & MEASURES The primary outcome & outcome measures Primary & Primary outcome measures & measures Primary outcome                                                                                                                           | 3 | 1028.598716 | 1.017681729 | 7783.428814 | 509  | 6695  |
| mechan molecular           | molecular mechanisms            | molecular mechanisms( & molecular mechanism                                                                                                                                                                                                                        | 2 | 1441.453669 | 1.024608501 | 5567.256605 | 894  | 4362  |
| mechan underli             | underlying mechanisms           | underlying mechanisms( & mechanisms underlying & underlying mechanism & mechanism underlying                                                                                                                                                                       | 2 | 901.6953627 | 1.021390374 | 2549.223198 | 561  | 3030  |
| mechan ventil              | mechanical ventilation          | mechanical ventilation                                                                                                                                                                                                                                             | 2 | 539.7583061 | 1.625592417 | 4716.435256 | 211  | 2583  |
| median os                  | median OS                       | median OS( & Median OS                                                                                                                                                                                                                                             | 2 | 457.9290585 | 1.127906977 | 3690.162113 | 258  | 4385  |
| median pf                  | median PFS                      | median PFS( & Median PFS                                                                                                                                                                                                                                           | 2 | 572.804733  | 1.170418006 | 5639.39104  | 311  | 5616  |

|                               |                                     |                                                                                                                                                                                         |   |             |             |             |      |       |
|-------------------------------|-------------------------------------|-----------------------------------------------------------------------------------------------------------------------------------------------------------------------------------------|---|-------------|-------------|-------------|------|-------|
| median progression-free       | median progression-free             | median progression-free& Median progression-free                                                                                                                                        | 2 | 873.3698539 | 1.065259117 | 6152.888246 | 521  | 8967  |
| median time                   | median time                         | median time& Median time                                                                                                                                                                | 2 | 1167.640417 | 1.086383602 | 3154.216903 | 697  | 9753  |
| membran plasma                | plasma membrane                     | plasma membrane                                                                                                                                                                         | 2 | 1065.353858 | 1.306949807 | 5065.146493 | 518  | 1988  |
| membran protein               | membrane proteins                   | membrane proteins& membrane protein& proteins in the membrane& protein within the membrane& protein and membrane                                                                        | 2 | 1066.927497 | 1.25323475  | 4619.179522 | 541  | 2289  |
| men and women                 | men and women                       | men and women& women and men& women than men& men than women& men or women& men versus women& women vs. men& women or men& men nor women& women as men& men vs. women                   | 3 | 1013.423758 | 1.311610964 | 2655.49164  | 198  | 5658  |
| messenger ma                  | messenger RNA                       | messenger RNA& messenger RNAs                                                                                                                                                           | 2 | 1274.647899 | 1.024020228 | 7808.235292 | 791  | 3868  |
| meta-analysis review systemat | systematic review and meta-analysis | systematic review and meta-analysis& Systematic review and meta-analysis                                                                                                                | 4 | 742.6562162 | 1.021857924 | 24992.31766 | 366  | 3895  |
| metastat patient              | patients with metastatic            | patients with metastatic& metastatic patients& patients metastatic                                                                                                                      | 3 | 428.0299104 | 1.142857143 | 2665.490624 | 239  | 3298  |
| method patient                | Patients and Methods                | Patients and Methods& Methods Patients& Methods All Patients& Methods The patients& patients Methods& Methods Of the patients& Methods Although patients& Methods From patients& Method | 3 | 10419.06631 | 1           | 27125.52224 | 6721 | 85087 |
| method result                 | Methods and results                 | Methods and results& Methods and Results& Methods Results                                                                                                                               | 3 | 3417.944725 | 1           | 15447.51737 | 2172 | 21858 |
| mice transgen                 | transgenic mice                     | transgenic mice                                                                                                                                                                         | 2 | 574.3783724 | 1.137071651 | 1292.846374 | 321  | 1529  |
| mice wild-typ                 | wild-type mice                      | wild-type mice& mice from wild-type& mice with a wild-type                                                                                                                              | 2 | 398.1307622 | 1.090517241 | 1419.058858 | 232  | 1176  |
| missense mutat                | missense mutations                  | missense mutations& missense mutation                                                                                                                                                   | 2 | 597.982963  | 1.111111111 | 1695.878603 | 342  | 1693  |
| model mous                    | mouse model                         | mouse model& mouse models& mouse as a model& mouse that models                                                                                                                          | 2 | 2251.877948 | 1.096551724 | 4100.273889 | 1305 | 7260  |
| model regress                 | regression models                   | regression models& regression model& model regression                                                                                                                                   | 2 | 827.734312  | 1.021359223 | 2492.702715 | 771  | 9919  |
| model system                  | model system                        | model system& model systems& systems model& system model& model of the system                                                                                                           | 2 | 597.982963  | 1.016042781 | 1299.35798  | 374  | 1347  |
| molecul small                 | small molecules                     | small molecules& small molecule                                                                                                                                                         | 2 | 550.7737817 | 1.118210863 | 1549.549588 | 313  | 1414  |
| mortal rate                   | mortality rates                     | mortality rates& mortality rate& Mortality rates& rates of mortality& rate of mortality& mortality during rate& mortality and rates& mortality or rates                                 | 2 | 2413.962803 | 1.568507157 | 2270.607766 | 978  | 11476 |
| mortal risk                   | mortality risk                      | mortality risk& risk of mortality& risk for mortality& mortality and risk& risk mortality                                                                                               | 2 | 489.4015481 | 1.264227642 | 1427.997604 | 271  | 3574  |
| multipl myeloma               | multiple myeloma                    | multiple myeloma& Multiple Myeloma                                                                                                                                                      | 2 | 730.1686706 | 1.230769231 | 1760.958088 | 418  | 3824  |
| multipl sclerosi              | multiple sclerosis                  | multiple sclerosis                                                                                                                                                                      | 2 | 1206.981402 | 1.779582367 | 1196.114575 | 431  | 2915  |
| mutat point                   | point mutations                     | point mutations& point mutation                                                                                                                                                         | 2 | 585.393848  | 1.110447761 | 1130.641065 | 335  | 1875  |
| myelodysplast syndrom         | myelodysplastic syndrome            | myelodysplastic syndrome& myelodysplastic syndromes                                                                                                                                     | 2 | 442.1926648 | 1.151639344 | 5343.210279 | 244  | 2562  |
| natriuret peptid              | natriuretic peptide                 | natriuretic peptide& natriuretic peptides                                                                                                                                               | 2 | 404.4253197 | 1.241545894 | 2192.353238 | 394  | 4091  |
| nervou system                 | nervous system                      | nervous system                                                                                                                                                                          | 2 | 456.3554192 | 1.062271062 | 1973.556982 | 274  | 1075  |
| object rate respons           | objective response rate             | objective response rate& rate of objective response                                                                                                                                     | 3 | 756.5561988 | 1.168711656 | 14338.78687 | 326  | 6199  |
| object respons                | objective response                  | objective response& objective responses& Objective response                                                                                                                             | 2 | 945.7572652 | 1.362811791 | 9819.618915 | 712  | 12410 |
| observ report                 | report observations                 | report observations& report the observation& report on the observation& report observation& report on observations& report an observation& report on observation                        | 2 | 527.1691911 | 1           | 6880.290621 | 335  | 757   |
| observ studi                  | observational study                 | observational study& observational studies& Observational study                                                                                                                         | 2 | 1079.516612 | 1.106451613 | 1309.829848 | 621  | 6325  |
| ocean southern                | Southern Ocean                      | Southern Ocean                                                                                                                                                                          | 2 | 393.4098441 | 1.666666667 | 8094.046244 | 150  | 666   |
| odd ratio                     | odds ratio                          | odds ratio& odds ratios& Odds ratios& ratio of odds                                                                                                                                     | 2 | 5328.342928 | 1.1740638   | 7016.746892 | 3331 | 36911 |
| onset symptom                 | symptom onset                       | symptom onset& onset of symptoms& symptoms onset& onset of the symptoms& onset symptoms                                                                                                 | 2 | 514.5800761 | 1.318548387 | 1112.074861 | 248  | 2929  |
| option treatment              | treatment options                   | treatment options& treatment option& options for treatment& option for treatment& option for the treatment                                                                              | 2 | 923.7263139 | 1.055755264 | 1490.601566 | 545  | 7228  |
| outcom primari                | primary outcome                     | primary outcome& primary outcomes& Primary outcomes& Primary outcome& outcomes Primary                                                                                                  | 2 | 4207.911692 | 1.184758529 | 12277.54741 | 2421 | 29018 |
| outcom secondari              | Secondary outcomes                  | Secondary outcomes& secondary outcomes& secondary outcome                                                                                                                               | 2 | 1819.127119 | 1.119070668 | 12331.48955 | 1033 | 14021 |
| overall rate respons          | overall response rate               | overall response rate& overall rate of response& rate of overall response                                                                                                               | 3 | 935.2702615 | 1.087759815 | 10135.03243 | 433  | 6827  |
| overall rate surviv           | overall survival rates              | overall survival rates& overall survival rate                                                                                                                                           | 3 | 510.3279346 | 1.122270742 | 1962.330109 | 229  | 3089  |
| oxid stress                   | oxidative stress                    | oxidative stress                                                                                                                                                                        | 2 | 635.7503081 | 1.320261438 | 1106.983539 | 306  | 2075  |
| oxygen reactiv speci          | reactive oxygen species             | reactive oxygen species& reactive species of oxygen                                                                                                                                     | 3 | 613.5849486 | 1.084210526 | 1540.371741 | 285  | 1550  |
| p trend                       | P for trend                         | P for trend& P trend& trend P                                                                                                                                                           | 3 | 413.867156  | 1.43715847  | 1654.432917 | 183  | 2572  |
| partial respons               | partial response                    | partial response& partial responses                                                                                                                                                     | 2 | 1652.321345 | 1.101783841 | 18473.48655 | 953  | 14936 |
| pathway signal                | signaling pathway                   | signaling pathway& signaling pathways& signalling pathway& signalling pathways& pathway signaling                                                                                       | 2 | 1669.631378 | 1.079348932 | 6872.839022 | 983  | 5861  |
| proportion patient            | proportion of patients              | proportion of patients& proportions of patients& proportion of all patients& proportion of the patients& proportions of all patients& proportion of these patients                      | 3 | 1312.415224 | 1.176304654 | 2368.810184 | 709  | 9507  |
| patient receiv                | patients receiving                  | patients receiving& Patients receiving                                                                                                                                                  | 2 | 1894.661809 | 1.188548865 | 1187.335102 | 1074 | 14460 |
| patient undergo               | patients undergoing                 | patients undergoing                                                                                                                                                                     | 2 | 923.7263139 | 1.181086519 | 2374.909342 | 559  | 6720  |
| percentag point               | percentage points                   | percentage points& points in the percentage                                                                                                                                             | 2 | 761.8414582 | 1.49382716  | 1324.782201 | 324  | 3793  |
| perform statu                 | performance status                  | performance status                                                                                                                                                                      | 2 | 1057.485661 | 1.195729537 | 6509.198207 | 900  | 15753 |
| period studi                  | study period                        | study period& period of study& period under study& study during the period& period of the study                                                                                         | 2 | 876.5171326 | 1.127530364 | 1174.807315 | 494  | 5535  |
| phase s                       | S phase                             | S phase                                                                                                                                                                                 | 2 | 428.0299104 | 1.353233831 | 13340.49009 | 201  | 1103  |
| phase transit                 | phase transition                    | phase transition& phase transitions                                                                                                                                                     | 2 | 741.1841463 | 1.326760563 | 3395.826512 | 355  | 1063  |
| placebo vs                    | vs placebo                          | vs placebo& placebo vs                                                                                                                                                                  | 2 | 453.2081404 | 1.447236181 | 2529.977545 | 199  | 3015  |
| polymeras ma                  | RNA polymerase                      | RNA polymerase                                                                                                                                                                          | 2 | 720.7268344 | 1.153652393 | 8143.472602 | 705  | 3588  |
| polymorph single-nucleotid    | single-nucleotide polymorphisms     | single-nucleotide polymorphisms& single-nucleotide polymorphism                                                                                                                         | 2 | 516.1537155 | 1.041269841 | 2964.409601 | 315  | 2223  |
| postmenopaus women            | postmenopausal women                | postmenopausal women                                                                                                                                                                    | 2 | 920.5790352 | 1.392857143 | 1855.994547 | 420  | 5293  |
| primari tumor                 | primary tumor                       | primary tumor& primary tumors                                                                                                                                                           | 2 | 637.3239474 | 1.306451613 | 1791.716892 | 310  | 3395  |
| profil safeti                 | safety profile                      | safety profile                                                                                                                                                                          | 2 | 608.9984387 | 1.057377049 | 3429.762106 | 430  | 6804  |
| prognost signific             | prognostic significance             | prognostic significance                                                                                                                                                                 | 2 | 539.7583061 | 1.124590164 | 2210.483456 | 305  | 3771  |
| prognost valu                 | prognostic value                    | prognostic value& Prognostic value                                                                                                                                                      | 2 | 1133.020351 | 1.208053691 | 1782.215847 | 596  | 7258  |
| progress tumor                | tumor progression                   | tumor progression& progression of tumor                                                                                                                                                 | 2 | 453.2081404 | 1.205020921 | 1169.610409 | 239  | 2471  |
| propens score                 | propensity score                    | propensity score                                                                                                                                                                        | 2 | 393.4098441 | 1.256281407 | 1270.37547  | 199  | 2809  |
| prostatectomi radic           | radical prostatectomy               | radical prostatectomy                                                                                                                                                                   | 2 | 525.5955517 | 1.582938389 | 4353.208987 | 211  | 2525  |
| protein synthesi              | protein synthesis                   | protein synthesis& synthesis of protein                                                                                                                                                 | 2 | 632.6030293 | 1.260188088 | 4821.023162 | 319  | 1443  |
| purpos studi                  | purpose of this study               | purpose of this study& Purpose This study& purpose of the study& Purpose In this study& study purpose& Purpose The study                                                                | 4 | 615.2929962 | 1           | 1102.470148 | 391  | 4672  |
| quantum state                 | quantum states                      | quantum states& quantum state& state quantum& state as a quantum                                                                                                                        | 2 | 497.2700429 | 1.253968254 | 1288.15766  | 252  | 651   |
| radiat therapi                | radiation therapy                   | radiation therapy& Radiation Therapy                                                                                                                                                    | 2 | 1595.670328 | 1.293367347 | 3060.764295 | 883  | 9778  |
| rang wide                     | wide range                          | wide range                                                                                                                                                                              | 2 | 1260.48514  | 1.024296675 | 1474.639499 | 782  | 3346  |
| rate ratio                    | rate ratio                          | rate ratio& rate ratios& ratio of the rate                                                                                                                                              | 2 | 889.1062477 | 1.358173077 | 5447.110719 | 544  | 6513  |
| rate respons                  | response rate                       | response rate& response rates& Response rates& rate of response& rates of response& rate response& response than the rate                                                               | 2 | 2944.279273 | 1.294809689 | 16665.39599 | 2044 | 29756 |
| rate surviv                   | survival rates                      | survival rates& survival rate                                                                                                                                                           | 2 | 1391.097209 | 1.210958904 | 2480.849374 | 791  | 10244 |
| receptor toll-lik             | Toll-like receptor                  | Toll-like receptor& Toll-like receptors& receptor Toll-like& receptors Toll-like                                                                                                        | 2 | 462.6499767 | 1.035211268 | 5299.882638 | 284  | 1676  |
| regul transcript              | transcriptional regulation          | transcriptional regulation& transcriptional regulators                                                                                                                                  | 2 | 428.0299104 | 1.038167939 | 2851.634753 | 262  | 1406  |
| rel risk                      | relative risk                       | relative risk& relative risks& Relative risks                                                                                                                                           | 2 | 3575.308663 | 1.319396051 | 4634.639076 | 1770 | 21242 |
| research treatment            | Research and Treatment              | Research and Treatment                                                                                                                                                                  | 3 | 446.9135829 | 1.010676157 | 3939.247115 | 281  | 3595  |
| result show                   | results show                        | results show& show results& show that this results& show that the results& show the results& show that these results& show that it results& results We show& results and show           | 2 | 481.5336492 | 1.25446281  | 2405.751    | 247  | 3586  |
| review systemat               | systematic review                   | systematic review& Systematic review& systematic reviews                                                                                                                                | 2 | 1343.888027 | 1.004705882 | 1558.160229 | 850  | 3813  |
| rhythm sinu                   | sinus rhythm                        | sinus rhythm                                                                                                                                                                            | 2 | 885.9589689 | 1.172916667 | 5356.182203 | 908  | 8629  |
| risk stratif                  | risk stratification                 | risk stratification& stratification of risk                                                                                                                                             | 2 | 421.7335329 | 1.604790419 | 3685.507589 | 167  | 1758  |
| risk stroke                   | stroke risk                         | stroke risk& risk of stroke& risk for stroke& risk of a stroke                                                                                                                          | 2 | 750.6259825 | 1.15496368  | 1200.37519  | 413  | 4442  |
| room temperatur               | room temperature                    | room temperature                                                                                                                                                                        | 2 | 445.3399435 | 1.429292929 | 1470.493762 | 198  | 2312  |
| scale time                    | time scales                         | time scales& time scale                                                                                                                                                                 | 2 | 719.153195  | 1.120098039 | 4924.277658 | 408  | 1056  |
| sea surfac temperatur         | sea surface temperature             | sea surface temperature& sea surface temperatures                                                                                                                                       | 2 | 467.3708948 | 1.072202166 | 1971.858316 | 277  | 679   |
|                               |                                     |                                                                                                                                                                                         | 3 | 444.799445  | 1.317647059 | 5341.51801  | 170  | 782   |

|                      |                           |                                                       |   |             |             |             |      |       |
|----------------------|---------------------------|-------------------------------------------------------|---|-------------|-------------|-------------|------|-------|
| signal transduct     | signal transduction       | signal transduction                                   | 2 | 418.5880741 | 1.090163934 | 2299.119035 | 244  | 1200  |
| size tumor           | tumor size                | tumor size & size of tumor & size of the tumor        | 2 | 580.6729299 | 1.294736842 | 2486.420613 | 285  | 3984  |
| solar system         | Solar System              | Solar System & solar system                           | 2 | 599.5566024 | 1.27        | 1312.008577 | 300  | 502   |
| solid tumor          | solid tumors              | solid tumors & Solid Tumors                           | 2 | 739.6105069 | 1.143552311 | 2922.753113 | 565  | 7375  |
| state unit           | United States             | United States                                         | 2 | 3968.718507 | 1.253479125 | 5645.002701 | 2012 | 19450 |
| stem-cell transplant | stem-cell transplantation | stem-cell transplantation & Stem-Cell Transplantation | 2 | 508.2855186 | 1.12543554  | 2429.971881 | 678  | 7213  |
| stent thrombosi      | stent thrombosis          | stent thrombosis                                      | 2 | 610.572078  | 1.694323144 | 4675.138996 | 229  | 2904  |
| suppressor tumor     | tumor suppressor          | tumor suppressor & tumor suppressors                  | 2 | 756.92054   | 1.190594059 | 4352.263287 | 535  | 3377  |
| suppressor tumour    | tumour suppressor         | tumour suppressor                                     | 2 | 440.6190254 | 1.212121212 | 2873.604028 | 231  | 1524  |
